# Supplementary material for: The High-Elevation Peatlands of the Northern Andes, Colombia
Source: MDPI journal article supplement (doi:10.3390/plants12040955), 2023-02-20
Supplement: s1 [file s1]

---

Article

# The High-Elevation Peatlands of the Northern Andes, Colombia

Juan C. Benavides <sup>1,\*</sup>, Dale H. Vitt <sup>2</sup> and David J. Cooper <sup>3</sup>

<sup>1</sup> Departamento de Ecología y Territorio, Pontificia Universidad Javeriana, Bogotá 110231, Colombia

<sup>2</sup> School of Biological Sciences, Plant Biology, Southern Illinois University, Carbondale, IL 62901-6509, USA

<sup>3</sup> Department of Forest and Rangeland Stewardship, Colorado State University, Fort Collins, CO 80523-1572, USA

\* Correspondence: jubenavides@javeriana.edu.co

## Supplementary material

Tables

**Table S1.** Location, habitat, and identification of plant specimens collected and deposited at the COL and SIU herbaria indicating the collection number that corresponds to the collector Juan C. Benavides (JCB #) from 121 Andean peatlands in the Colombian Andes.

| PLOT | CODELONG | Site                                                                                   | Habitat                                                                             | SPECIES                    | Date    | Col Number |
|------|----------|----------------------------------------------------------------------------------------|-------------------------------------------------------------------------------------|----------------------------|---------|------------|
| IGU3 | IGU3_20  | Boyaca, Chiquiza, Laguna de Iguaque. 5.6906 N, -73.4356 W, 3660 m.a.s.l.               | Lake fen. Small pond (kettle pond) sedimented with peat                             | Lepidozia sp               | 1/19/10 | 5200       |
| IGU2 | IGU2_4   | Boyaca, Chiquiza, Laguna de Iguaque. 5.688 N, -73.4362 W, 3589 m.a.s.l.                | Lake fen. Peatland on lake shore, vegetation dominated by S. magellanicum           | Campylopus arctocarpus     | 1/19/10 | 5201       |
| IGU6 | IGU6_6   | Boyaca, Chiquiza, Laguna de Cazadero (North side). 5.6952 N, -73.4221 W, 3576 m.a.s.l. | Lake fen. Lake fen on lake shore, of about 1 ha                                     | Sphagnum sancto-josephense | 1/20/10 | 5202       |
| IGU1 | IGU1_6   | Boyaca, Chiquiza, Laguna de Iguaque. 5.6881 N, -73.4355 W, 3589 m.a.s.l.               | Lake fen. Peatland on lake shore, vegetation dominated by S. magellanicum and Carex | Arcytophyllum muticum      | 1/19/10 | 5203       |
| IGU3 | IGU3_X1  | Boyaca, Chiquiza, Laguna de Iguaque. 5.6906 N, -73.4356 W, 3660 m.a.s.l.               | Lake fen. Small pond (kettle pond) sedimented with peat                             |                            | 1/19/10 | 5204       |
| IGU2 | IGU2_19  | Boyaca, Chiquiza, Laguna de Iguaque. 5.688 N, -73.4362 W, 3589 m.a.s.l.                | Lake fen. Peatland on lake shore, vegetation dominated by S. magellanicum           |                            | 1/19/10 | 5205       |
| IGU8 | IGU8_17  | Boyaca, Chiquiza, Laguna del Monte. 5.7087 N, -73.4243 W, 3831 m.a.s.l.                | Lake fen. Small peatland (<400 m <sup>2</sup> ) at lake shore                       | Riccardia paramorum        | 1/20/10 | 5206       |

|       |          |                                                                                               |                                                                                     |                                 |         |      |
|-------|----------|-----------------------------------------------------------------------------------------------|-------------------------------------------------------------------------------------|---------------------------------|---------|------|
| IGU12 | IGU12_X2 | Boyaca, Chiquiza, Laguna Ojo de Agua. 5.6909 N, -73.4285 W, 3595 m.a.s.l.                     | Lake fen. Peatland with large hummocks (>100 m2) on lake shore                      |                                 | 1/21/10 | 5207 |
| IGU3  | IGU3_X3  | Boyaca, Chiquiza, Laguna de Iguaque. 5.6906 N, -73.4356 W, 3660 m.a.s.l.                      | Lake fen. Small pond (kettle pond) sedimented with peat                             |                                 | 1/19/10 | 5208 |
| IGU1  | IGU1_X4  | Boyaca, Chiquiza, Laguna de Iguaque. 5.6881 N, -73.4355 W, 3589 m.a.s.l.                      | Lake fen. Peatland on lake shore, vegetation dominated by S. magellanicum and Carex |                                 | 1/19/10 | 5209 |
| IGU1  | IGU1_X4  | Boyaca, Chiquiza, Laguna de Iguaque. 5.6881 N, -73.4355 W, 3589 m.a.s.l.                      | Lake fen. Peatland on lake shore, vegetation dominated by S. magellanicum and Carex |                                 | 1/19/10 | 5210 |
| DUE1  | DUE1_2   | Valle del Cauca, Mpio Riofrio, Venecia, Paramo El Duende. 4.0699 N, -76.5058 W, 3502 m.a.s.l. | Slope fen. Fen on seeping slope with Espeletia                                      | Sphagnum oxyphyllum             | 6/3/10  | 5211 |
| DUE6  | DUE6_6   | Valle del Cauca, Mpio Riofrio, Venecia, Paramo El Duende. 4.0715 N, -76.5066 W, 3499 m.a.s.l. | Slope fen. Sedge-dominated slope fen                                                | Campylopus andersonii           | 6/3/10  | 5212 |
| DUE1  | DUE1_8   | Valle del Cauca, Mpio Riofrio, Venecia, Paramo El Duende. 4.0699 N, -76.5058 W, 3502 m.a.s.l. | Slope fen. Fen on seeping slope with Espeletia                                      | Breutelia chrysea               | 6/3/10  | 5213 |
| DUE8  | DUE8_4   | Valle del Cauca, Mpio Riofrio, Venecia, Paramo El Duende. 4.0716 N, -76.5051 W, 3478 m.a.s.l. | Slope fen. Sedge-dominated slope fen                                                | Calliergon stramineum           | 6/3/10  | 5214 |
| DUE8  | DUE8_10  | Valle del Cauca, Mpio Riofrio, Venecia, Paramo El Duende. 4.0716 N, -76.5051 W, 3478 m.a.s.l. | Slope fen. Sedge-dominated slope fen                                                | Sphagnum cf falciculatum Besch. | 6/3/10  | 5215 |

|      |         |                                                                                               |                                                |                        |        |      |
|------|---------|-----------------------------------------------------------------------------------------------|------------------------------------------------|------------------------|--------|------|
| DUE6 | DUE6_9  | Valle del Cauca, Mpio Riofrio, Venecia, Paramo El Duende. 4.0715 N, −76.5066 W, 3499 m.a.s.l. | Slope fen. Sedge-dominated slope fen           | Riccardia paramorum    | 6/3/10 | 5216 |
| DUE1 | DUE1_11 | Valle del Cauca, Mpio Riofrio, Venecia, Paramo El Duende. 4.0699 N, −76.5058 W, 3502 m.a.s.l. | Slope fen. Fen on seeping slope with Espeletia | Kurzia capillaris      | 6/3/10 | 5217 |
| DUE8 | DUE8_6  | Valle del Cauca, Mpio Riofrio, Venecia, Paramo El Duende. 4.0716 N, −76.5051 W, 3478 m.a.s.l. | Slope fen. Sedge-dominated slope fen           | Bartramia sp           | 6/3/10 | 5218 |
| DUE1 | DUE1_10 | Valle del Cauca, Mpio Riofrio, Venecia, Paramo El Duende. 4.0699 N, −76.5058 W, 3502 m.a.s.l. | Slope fen. Fen on seeping slope with Espeletia | Riccardia paramorum    | 6/3/10 | 5219 |
| DUE2 | DUE2_13 | Valle del Cauca, Mpio Riofrio, Venecia, Paramo El Duende. 4.0689 N, −76.506 W, 3510 m.a.s.l.  | Slope fen. Sedge-dominated slope fen           | Campylopus arctocarpus | 6/3/10 | 5220 |
| DUE7 | DUE7_2  | Valle del Cauca, Mpio Riofrio, Venecia, Paramo El Duende. 4.0725 N, −76.5018 W, 3438 m.a.s.l. | Slope fen. Sedge-dominated slope fen           | Agrostis sp3           | 6/3/10 | 5221 |
| DUE1 | DUE1_X1 | Valle del Cauca, Mpio Riofrio, Venecia, Paramo El Duende. 4.0699 N, −76.5058 W, 3502 m.a.s.l. | Slope fen. Fen on seeping slope with Espeletia |                        | 6/3/10 | 5222 |
| DUE1 | DUE1_X2 | Valle del Cauca, Mpio Riofrio, Venecia, Paramo El Duende. 4.0699 N, −76.5058 W, 3502 m.a.s.l. | Slope fen. Fen on seeping slope with Espeletia |                        | 6/3/10 | 5223 |
| DUE1 | DUE1_X3 | Valle del Cauca, Mpio Riofrio, Venecia, Paramo El Duende. 4.0699 N, −76.5058 W, 3502 m.a.s.l. | Slope fen. Fen on seeping slope with Espeletia |                        | 6/3/10 | 5224 |

|      |         |                                                                                                                                          |                                                            |                           |         |      |
|------|---------|------------------------------------------------------------------------------------------------------------------------------------------|------------------------------------------------------------|---------------------------|---------|------|
| DUE1 | DUE1_X4 | Valle del Cauca, Mpio Riofrio, Venecia, Paramo El Duende. 4.0699 N, −76.5058 W, 3502 m.a.s.l.                                            | Slope fen. Fen on seeping slope with Espeletia             |                           | 6/3/10  | 5225 |
| DUE1 | DUE1_X5 | Valle del Cauca, Mpio Riofrio, Venecia, Paramo El Duende. 4.0699 N, −76.5058 W, 3502 m.a.s.l.                                            | Slope fen. Fen on seeping slope with Espeletia             |                           | 6/3/10  | 5226 |
| DUE1 | DUE1_X6 | Valle del Cauca, Mpio Riofrio, Venecia, Paramo El Duende. 4.0699 N, −76.5058 W, 3502 m.a.s.l.                                            | Slope fen. Fen on seeping slope with Espeletia             |                           | 6/3/10  | 5227 |
| DUE1 | DUE1_X7 | Valle del Cauca, Mpio Riofrio, Venecia, Paramo El Duende. 4.0699 N, −76.5058 W, 3502 m.a.s.l.                                            | Slope fen. Fen on seeping slope with Espeletia             |                           | 6/3/10  | 5228 |
| NEV4 | NEV4_9  | Caldas, Murillo, PNN Los Nevados, Distichia peatland in the trail to Muzu. Near Laguna Verde. 4.8113 N, −75.3432 W, 4433 m.a.s.l.        | Plateau fen. Peatland in old lake system but now is raised | Anastrophyllum nigrescens | 3/25/10 | 5229 |
| NEV8 | NEV8_11 | Caldas, Murillo, PNN Los Nevados, Distichia peatland, heads of Alfombrales. 4.8593 N, −75.3424 W, 4485 m.a.s.l.                          | Stream fen. Glacier-fed peatland in heads of stream        | Fossombronina peruviana   | 3/26/10 | 5230 |
| NEV5 | NEV5_8  | Caldas, Murillo, PNN Los Nevados, Distichia peatland heads of Rio Recio, and Alfombrales. 4.8505 N, −75.3325 W, 4465 m.a.s.l.            | Stream fen. Glacier-fed peatland in heads of stream        | Calliergon stramineum     | 3/26/10 | 5231 |
| NEV6 | NEV6_11 | Caldas, Murillo, PNN Los Nevados, Distichia peatland, water divide between Rio Recio and Alfombrales. 4.854 N, −75.3344 W, 4486 m.a.s.l. | Stream fen. Glacier-fed peatland in heads of stream        | Warnstorfia exannulata    | 3/26/10 | 5232 |

|      |         |                                                                                                                                   |                                                            |                     |         |      |
|------|---------|-----------------------------------------------------------------------------------------------------------------------------------|------------------------------------------------------------|---------------------|---------|------|
| NEV2 | NEV2_19 | Caldas, Murillo, PNN Los Nevados, Distichia peatland in the trail to Muzu. 4.8103 N, −75.3422 W, 4432 m.a.s.l.                    | Plateau fen. Peatland in old lake system but now is raised | Liverwort           | 3/25/10 | 5233 |
| NEV9 | NEV9_2  | Caldas, Murillo, PNN Los Nevados, Distichia peatland, heads of Alfombrales. 4.8603 N, −75.3475 W, 4485 m.a.s.l.                   | Stream fen. Glacier-fed peatland in heads of stream        | Riccardia paramorum | 3/26/10 | 5234 |
| NEV4 | NEV4_7  | Caldas, Murillo, PNN Los Nevados, Distichia peatland in the trail to Muzu. Near Laguna Verde. 4.8113 N, −75.3432 W, 4433 m.a.s.l. | Plateau fen. Peatland in old lake system but now is raised | Lophozia sp2        | 3/25/10 | 5235 |
| NEV1 | NEV1_4  | Caldas, Murillo, PNN Los Nevados, Distichia peatland in the trail to Muzu. 4.8527 N, −75.3649 W, 4432 m.a.s.l.                    | Plateau fen. Peatland in old lake system but now is raised | Isotachis sp        | 3/25/10 | 5236 |
| NEV2 | NEV2_5  | Caldas, Murillo, PNN Los Nevados, Distichia peatland in the trail to Muzu. 4.8103 N, −75.3422 W, 4432 m.a.s.l.                    | Plateau fen. Peatland in old lake system but now is raised | Telaranea nematodes | 3/25/10 | 5237 |
| NEV1 | NEV1_6  | Caldas, Murillo, PNN Los Nevados, Distichia peatland in the trail to Muzu. 4.8527 N, −75.3649 W, 4432 m.a.s.l.                    | Plateau fen. Peatland in old lake system but now is raised | Sphagnum sp nov     | 3/25/10 | 5238 |
| NEV8 | NEV8_17 | Caldas, Murillo, PNN Los Nevados, Distichia peatland, heads of Alfombrales. 4.8593 N, −75.3424 W, 4485 m.a.s.l.                   | Stream fen. Glacier-fed peatland in heads of stream        | Aneura sp           | 3/26/10 | 5239 |
| NEV7 | NEV7_61 | Caldas, Murillo, PNN Los Nevados, Distichia peatland, heads of Alfombrales. 4.8563 N, −75.3383 W, 4495 m.a.s.l.                   | Stream fen. Glacier-fed peatland in heads of stream        |                     | 3/26/10 | 5240 |

|      |         |                                                                                                                                           |                                                            |                       |         |      |
|------|---------|-------------------------------------------------------------------------------------------------------------------------------------------|------------------------------------------------------------|-----------------------|---------|------|
| NEV6 | NEV6_12 | Caldas, Murillo, PNN Los Nevados, Distichia peatland, water divide between Rio Recio and Alfombrables. 4.854 N, −75.3344 W, 4486 m.a.s.l. | Stream fen. Glacier-fed peatland in heads of stream        | Breutelia chrysea     | 3/26/10 | 5241 |
| NEV1 | NEV1_12 | Caldas, Murillo, PNN Los Nevados, Distichia peatland in the trail to Muzu. 4.8527 N, −75.3649 W, 4432 m.a.s.l.                            | Plateau fen. Peatland in old lake system but now is raised | Riccardia paramorum   | 3/25/10 | 5242 |
| NEV5 | NEV5_3  | Caldas, Murillo, PNN Los Nevados, Distichia peatland heads of Rio Recio, and Alfombrables. 4.8505 N, −75.3325 W, 4465 m.a.s.l.            | Stream fen. Glacier -fed peatland in heads of stream       | Calliergon stramineum | 3/26/10 | 5243 |
| NEV1 | NEV1_8  | Caldas, Murillo, PNN Los Nevados, Distichia peatland in the trail to Muzu. 4.8527 N, −75.3649 W, 4432 m.a.s.l.                            | Plateau fen. Peatland in old lake system but now is raised | Sphagnum sp nov       | 3/25/10 | 5244 |
| NEV2 | NEV2_18 | Caldas, Murillo, PNN Los Nevados, Distichia peatland in the trail to Muzu. 4.8103 N, −75.3422 W, 4432 m.a.s.l.                            | Plateau fen. Peatland in old lake system but now is raised | Adelanthus pittieri   | 3/25/10 | 5245 |
| NEV3 | NEV3_15 | Caldas, Murillo, PNN Los Nevados, Distichia peatland in the trail to Muzu. Near Laguna Verde. 4.8114 N, −75.3428 W, 4432 m.a.s.l.         | Plateau fen. Peatland in old lake system but now is raised | Lobatiriccardia sp    | 3/25/10 | 5246 |
| NEV5 | NEV5_5  | Caldas, Murillo, PNN Los Nevados, Distichia peatland heads of Rio Recio, and Alfombrables. 4.8505 N, −75.3325 W, 4465 m.a.s.l.            | Stream fen. Glacier-fed peatland in heads of stream        | Lophozia sp2          | 3/26/10 | 5247 |
| NEV5 | NEV5_4  | Caldas, Murillo, PNN Los Nevados, Distichia peatland heads of Rio Recio,                                                                  | Stream fen. Glacier-fed peatland in heads of stream        | Lophozia sp           | 3/26/10 | 5248 |

|      |         |                                                                                                                                   |                                                            |                     |         |      |
|------|---------|-----------------------------------------------------------------------------------------------------------------------------------|------------------------------------------------------------|---------------------|---------|------|
|      |         | and Alfombrales. 4.8505 N, −75.3325 W, 4465 m.a.s.l.                                                                              |                                                            |                     |         |      |
| NEV2 | NEV2_15 | Caldas, Murillo, PNN Los Nevados, Distichia peatland in the trail to Muzu. 4.8103 N, −75.3422 W, 4432 m.a.s.l.                    | Plateau fen. Peatland in old lake system but now is raised | Aneura sp           | 3/25/10 | 5249 |
| NEV1 | NEV1_7  | Caldas, Murillo, PNN Los Nevados, Distichia peatland in the trail to Muzu. 4.8527 N, −75.3649 W, 4432 m.a.s.l.                    | Plateau fen. Peatland in old lake system but now is raised | Riccardia paramorum | 3/25/10 | 5250 |
| NEV7 | NEV7_8  | Caldas, Murillo, PNN Los Nevados, Distichia peatland, heads of Alfombrales. 4.8563 N, −75.3383 W, 4495 m.a.s.l.                   | Stream fen. Glacier-fed peatland in heads of stream        | Riccardia paramorum | 3/26/10 | 5251 |
| NEV7 | NEV7_9  | Caldas, Murillo, PNN Los Nevados, Distichia peatland, heads of Alfombrales. 4.8563 N, −75.3383 W, 4495 m.a.s.l.                   | Stream fen. Glacier-fed peatland in heads of stream        | Isotachis sp        | 3/26/10 | 5252 |
| NEV2 | NEV2_16 | Caldas, Murillo, PNN Los Nevados, Distichia peatland in the trail to Muzu. 4.8103 N, −75.3422 W, 4432 m.a.s.l.                    | Plateau fen. Peatland in old lake system but now is raised | Lophozia sp         | 3/25/10 | 5253 |
| NEV3 | NEV3_9  | Caldas, Murillo, PNN Los Nevados, Distichia peatland in the trail to Muzu. Near Laguna Verde. 4.8114 N, −75.3428 W, 4432 m.a.s.l. | Plateau fen. Peatland in old lake system but now is raised | Isotachis sp        | 3/25/10 | 5254 |
| NEV2 | NEV2_6  | Caldas, Murillo, PNN Los Nevados, Distichia peatland in the trail to Muzu. 4.8103 N, −75.3422 W, 4432 m.a.s.l.                    | Plateau fen. Peatland in old lake system but now is raised | Lophozia sp2        | 3/25/10 | 5255 |



|      |         |                                                                                                                               |                                                            |                      |         |      |
|------|---------|-------------------------------------------------------------------------------------------------------------------------------|------------------------------------------------------------|----------------------|---------|------|
| NEV2 | NEV2_17 | Caldas, Murillo, PNN Los Nevados, Distichia peatland in the trail to Muzu. 4.8103 N, −75.3422 W, 4432 m.a.s.l.                | Plateau fen. Peatland in old lake system but now is raised | Pleurozium schreberi | 3/25/10 | 5256 |
| NEV1 | NEV1_5  | Caldas, Murillo, PNN Los Nevados, Distichia peatland in the trail to Muzu. 4.8527 N, −75.3649 W, 4432 m.a.s.l.                | Plateau fen. Peatland in old lake system but now is raised | Breutelia chrysea    | 3/25/10 | 5257 |
| NEV5 | NEV5_2  | Caldas, Murillo, PNN Los Nevados, Distichia peatland heads of Rio Recio, and Alfombrales. 4.8505 N, −75.3325 W, 4465 m.a.s.l. | Stream fen. Glacier-fed peatland in heads of stream        | Bryum argenteum      | 3/26/10 | 5258 |
| NEV5 | NEV5_X1 | Caldas, Murillo, PNN Los Nevados, Distichia peatland heads of Rio Recio, and Alfombrales. 4.8505 N, −75.3325 W, 4465 m.a.s.l. | Stream fen. Glacier-fed peatland in heads of stream        |                      | 3/26/10 | 5259 |
| NEV1 | NEV1_X2 | Caldas, Murillo, PNN Los Nevados, Distichia peatland in the trail to Muzu. 4.8527 N, −75.3649 W, 4432 m.a.s.l.                | Plateau fen. Peatland in old lake system but now is raised |                      | 3/25/10 | 5260 |
| NEV1 | NEV1_X3 | Caldas, Murillo, PNN Los Nevados, Distichia peatland in the trail to Muzu. 4.8527 N, −75.3649 W, 4432 m.a.s.l.                | Plateau fen. Peatland in old lake system but now is raised |                      | 3/25/10 | 5261 |
| NEV1 | NEV1_X4 | Caldas, Murillo, PNN Los Nevados, Distichia peatland in the trail to Muzu. 4.8527 N, −75.3649 W, 4432 m.a.s.l.                | Plateau fen. Peatland in old lake system but now is raised |                      | 3/25/10 | 5262 |
| NEV1 | NEV1_X5 | Caldas, Murillo, PNN Los Nevados, Distichia peatland in the trail to Muzu. 4.8527 N, −75.3649 W, 4432 m.a.s.l.                | Plateau fen. Peatland in old lake system but now is raised |                      | 3/25/10 | 5263 |
| NEV6 | NEV6_X6 | Caldas, Murillo, PNN Los Nevados, Distichia peatland, water divide                                                            | Stream fen. Glacier-fed peatland in heads of stream        |                      | 3/26/10 | 5264 |

|      |          |                                                                                                                           |                                                                            |                                  |         |      |
|------|----------|---------------------------------------------------------------------------------------------------------------------------|----------------------------------------------------------------------------|----------------------------------|---------|------|
|      |          | between Rio Recio and Alfombrales.<br>4.854 N, −75.3344 W, 4486 m.a.s.l.                                                  |                                                                            |                                  |         |      |
| NEV1 | NEV1_X7  | Caldas, Murillo, PNN Los Nevados,<br>Distichia peatland in the trail to Muzu.<br>4.8527 N, −75.3649 W, 4432 m.a.s.l.      | Plateau fen. Peatland in old lake system<br>but now is raised              |                                  | 3/25/10 | 5265 |
| NEV1 | NEV1_X8  | Caldas, Murillo, PNN Los Nevados,<br>Distichia peatland in the trail to Muzu.<br>4.8527 N, −75.3649 W, 4432 m.a.s.l.      | Plateau fen. Peatland in old lake system<br>but now is raised              |                                  | 3/25/10 | 5266 |
| NEV1 | NEV1_X9  | Caldas, Murillo, PNN Los Nevados,<br>Distichia peatland in the trail to Muzu.<br>4.8527 N, −75.3649 W, 4432 m.a.s.l.      | Plateau fen. Peatland in old lake system<br>but now is raised              |                                  | 3/25/10 | 5267 |
| NEV1 | NEV1_X10 | Caldas, Murillo, PNN Los Nevados,<br>Distichia peatland in the trail to Muzu.<br>4.8527 N, −75.3649 W, 4432 m.a.s.l.      | Plateau fen. Peatland in old lake system<br>but now is raised              |                                  | 3/25/10 | 5268 |
| NEV1 | NEV1_X11 | Caldas, Murillo, PNN Los Nevados,<br>Distichia peatland in the trail to Muzu.<br>4.8527 N, −75.3649 W, 4432 m.a.s.l.      | Plateau fen. Peatland in old lake system<br>but now is raised              |                                  | 3/25/10 | 5269 |
| CHI1 | CHI1_6   | Cundinamarca, Fomeque, PNN<br>Chingaza, Heads of “Rio Frio”, Laguna<br>de Chingaza. 4.501 N, −73.7531 W, 3333<br>m.a.s.l. | Stream fen. Peatland in backwater<br>floodplain from Rio Frio margins      | Sphagnum cf<br>falcatulum Besch. | 3/12/10 | 5270 |
| SUM2 | SUM2_11  | Sumapaz. Road to Nazareth. Fen close<br>to trout fishery at roadside. 4.2613 N,<br>−74.1909 W, 3552 m.a.s.l.              | Slope fen. Slope fen with a small stream (<<br>10 cm wide) running through | Arcytophyllum<br>muticum         | 1/27/09 | 3951 |
| SUM1 | SUM1_X1  | Sumapaz. Road to Nazareth. Fen close<br>to trout fishery at roadside. 4.2594 N,<br>−74.1882 W, 3526 m.a.s.l.              | Slope fen. Slope fen with a small stream (<<br>10 cm wide) running through |                                  | 1/27/09 | 5272 |

|      |         |                                                                                                        |                                                                                                         |                            |         |      |
|------|---------|--------------------------------------------------------------------------------------------------------|---------------------------------------------------------------------------------------------------------|----------------------------|---------|------|
| SUM3 | SUM3_4  | Sumapaz. Road to Nazareth. Fen close to trout fishery at roadside. 4.2759 N, -74.1969 W, 3569 m.a.s.l. | Slope fen.                                                                                              | Anastrophyllum nigrescens  | 1/28/09 | 3956 |
| SUM3 | SUM3_4  | Sumapaz. Road to Nazareth. Fen close to trout fishery at roadside. 4.2759 N, -74.1969 W, 3569 m.a.s.l. | Slope fen.                                                                                              | Vascular plant             | 1/28/09 | 3956 |
| SUM7 | SUM7_7  | Sumapaz. Road to Nazareth. Fen close to trout fishery at roadside. 4.2759 N, -74.1969 W, 3645 m.a.s.l. | Lake fen. Small glacier cirques with small lake, peatland developed from terrestrialization of the lake | Warnstorfia exannulata     | 1/30/09 | 5274 |
| SUM5 | SUM5_8  | Sumapaz. Road to Nazareth. Fen close to trout fishery at roadside. 4.2759 N, -74.1969 W, 3415 m.a.s.l. | Slope fen.                                                                                              | Sphagnum sancto-josephense | 1/29/09 | 3976 |
| SUM5 | SUM5_8  | Sumapaz. Road to Nazareth. Fen close to trout fishery at roadside. 4.2759 N, -74.1969 W, 3415 m.a.s.l. | Slope fen.                                                                                              | Sphagnum oxyphyllum        | 1/29/09 | 3976 |
| SUM4 | SUM4_14 | Sumapaz. Road to Nazareth. Fen close to trout fishery at roadside. 4.2759 N, -74.1969 W, 3667 m.a.s.l. | Slope fen.                                                                                              | Lycopodiella glaucescens   | 1/28/09 | 3973 |
| SUM1 | SUM1_X2 | Sumapaz. Road to Nazareth. Fen close to trout fishery at roadside. 4.2594 N, -74.1882 W, 3526 m.a.s.l. | Slope fen. Slope fen with a small stream (< 10 cm wide) running through                                 |                            | 1/27/09 | 5277 |
| SUM5 | SUM5_9  | Sumapaz. Road to Nazareth. Fen close to trout fishery at roadside. 4.2759 N, -74.1969 W, 3415 m.a.s.l. | Slope fen.                                                                                              | Lophocolea sp2             | 1/29/09 | 5278 |
| MA10 | MA10_9  | Mamapacha, lake "Los Patos". 5.1876 N, -73.272 W, 3145 m.a.s.l.                                        | Stream fen. Stream fen on spill of Lake los patos                                                       | Bryum laevigatum           | 2/22/09 | 3931 |
| MA10 | MA10_9  | Mamapacha, lake "Los Patos". 5.1876 N, -73.272 W, 3145 m.a.s.l.                                        | Stream fen. Stream fen on spill of Lake los patos                                                       | Pleurozium schreberi       | 2/22/09 | 3931 |

|      |         |                                                                                       |                                                                                                               |                       |         |      |
|------|---------|---------------------------------------------------------------------------------------|---------------------------------------------------------------------------------------------------------------|-----------------------|---------|------|
| MA10 | MA10_9  | Mamapacha, lake "Los Patos". 5.1876 N, -73.272 W, 3145 m.a.s.l.                       | Stream fen. Stream fen on spill of Lake los patos                                                             | Bryum laevigatum      | 2/22/09 | 4054 |
| MA10 | MA10_9  | Mamapacha, lake "Los Patos". 5.1876 N, -73.272 W, 3145 m.a.s.l.                       | Stream fen. Stream fen on spill of Lake los patos                                                             | Pleurozium schreberi  | 2/22/09 | 4054 |
| MA1  | MA1_4   | Mamapacha, lake "La Tarea". 5.1918 N, -73.2649 W, 3059 m.a.s.l.                       | Slope fen. Lake fen, 50 m W from lake. Lake water level was raised around 8 m 10 years ago with a dam.        | Sphagnum sp           | 2/17/09 | 3853 |
| MA1  | MA1_4   | Mamapacha, lake "La Tarea". 5.1918 N, -73.2649 W, 3059 m.a.s.l.                       | Slope fen. Lake fen, 50 m W from lake. Lake water level was raised around 8 m 10 years ago with a dam.        | Sphagnum sp           | 2/17/09 | 3879 |
| MA3  | MA3_13  | Mamapacha, lake "La Tarea". 5.19 N, -73.2639 W, 3064 m.a.s.l.                         | Lake fen. Lake fen, floating mat on lake anchored to rock outcrop                                             | Polytrichum commune   | 2/18/09 | 5281 |
| MA11 | MA11_22 | Mamapacha, 300 m from way to Lake Lajadilla. 5.1864 N, -73.2701 W, 3180 m.a.s.l.      | Slope fen. Small fen at outlet of small watershed less than 5 ha                                              | Isotachis sp          | 2/22/09 | 5282 |
| MA8  | MA8_X1  | Mamapacha, Lake "Lajadilla". 5.1842 N, -73.2749 W, 3240 m.a.s.l.                      | Stream fen. Small fen near to Lajadilla lake, fen formed by ridge stopping the flow of water towards the lake |                       | 2/21/09 | 5283 |
| MA1  | MA1_X2  | Mamapacha, lake "La Tarea". 5.1918 N, -73.2649 W, 3059 m.a.s.l.                       | Slope fen. Lake fen, 50 m W from lake. Lake water level was raised around 8 m 10 years ago with a dam.        |                       | 2/17/09 | 5284 |
| MA4  | MA4_X3  | Mamapacha, lake "La Tarea". 5.1895 N, -73.2639 W, 3064 m.a.s.l.                       | Lake fen. Lake fen, floating mat on lake anchored to rock outcrop                                             |                       | 2/18/09 | 5285 |
| MA4  | MA4_X4  | Mamapacha, lake "La Tarea". 5.1895 N, -73.2639 W, 3064 m.a.s.l.                       | Lake fen. Lake fen, floating mat on lake anchored to rock outcrop                                             |                       | 2/18/09 | 5286 |
| RAB2 | RAB2_2  | Boyaca, Raquira, Paramo Rabanal, Sitio Calicanto. 5.4291 N, -73.5709 W, 3408 m.a.s.l. | Lake fen. Large peatland complex next to artificial reservoir                                                 | Sphagnum magellanicum | 2/6/10  | 5287 |

|      |         |                                                                               |                                                            |                        |        |      |
|------|---------|-------------------------------------------------------------------------------|------------------------------------------------------------|------------------------|--------|------|
| RAB1 | RAB1_11 | Boyaca, Raquira, Cuchilla pena El Bosque. 5.4022 N, -73.5962 W, 3431 m.a.s.l. | Slope fen. Small hummocks in slight incline towards stream | Lophozia sp            | 2/5/10 | 5288 |
| RAB1 | RAB1_7  | Boyaca, Raquira, Cuchilla pena El Bosque. 5.4022 N, -73.5962 W, 3431 m.a.s.l. | Slope fen. Small hummocks in slight incline towards stream | Campylopus arctocarpus | 2/5/10 | 5289 |
| RAB1 | RAB1_8  | Boyaca, Raquira, Cuchilla pena El Bosque. 5.4022 N, -73.5962 W, 3431 m.a.s.l. | Slope fen. Small hummocks in slight incline towards stream | Marchantia berteriana  | 2/5/10 | 5290 |
| RAB1 | RAB1_X1 | Boyaca, Raquira, Cuchilla pena El Bosque. 5.4022 N, -73.5962 W, 3431 m.a.s.l. | Slope fen. Small hummocks in slight incline towards stream |                        | 2/5/10 | 5291 |
| RAB1 | RAB1_X2 | Boyaca, Raquira, Cuchilla pena El Bosque. 5.4022 N, -73.5962 W, 3431 m.a.s.l. | Slope fen. Small hummocks in slight incline towards stream |                        | 2/5/10 | 5292 |
| RAB1 | RAB1_X3 | Boyaca, Raquira, Cuchilla pena El Bosque. 5.4022 N, -73.5962 W, 3431 m.a.s.l. | Slope fen. Small hummocks in slight incline towards stream |                        | 2/5/10 | 5293 |
| RAB1 | RAB1_X4 | Boyaca, Raquira, Cuchilla pena El Bosque. 5.4022 N, -73.5962 W, 3431 m.a.s.l. | Slope fen. Small hummocks in slight incline towards stream |                        | 2/5/10 | 5294 |
| RAB1 | RAB1_X5 | Boyaca, Raquira, Cuchilla pena El Bosque. 5.4022 N, -73.5962 W, 3431 m.a.s.l. | Slope fen. Small hummocks in slight incline towards stream |                        | 2/5/10 | 5295 |
| RAB1 | RAB1_X6 | Boyaca, Raquira, Cuchilla pena El Bosque. 5.4022 N, -73.5962 W, 3431 m.a.s.l. | Slope fen. Small hummocks in slight incline towards stream |                        | 2/5/10 | 5296 |

|      |         |                                                                                                                  |                                                              |                                 |          |      |
|------|---------|------------------------------------------------------------------------------------------------------------------|--------------------------------------------------------------|---------------------------------|----------|------|
| RAB1 | RAB1_X7 | Boyaca, Raquira, Cuchilla pena El Bosque. 5.4022 N, -73.5962 W, 3431 m.a.s.l.                                    | Slope fen. Small hummocks in slight incline towards stream   |                                 | 2/5/10   | 5297 |
| RAB1 | RAB1_X8 | Boyaca, Raquira, Cuchilla pena El Bosque. 5.4022 N, -73.5962 W, 3431 m.a.s.l.                                    | Slope fen. Small hummocks in slight incline towards stream   |                                 | 2/5/10   | 5298 |
| PAM1 | PAM1_8  | Norte de Santander, Pamplona, Laguna del Seminarista. Small sedimented lake. 7.3891 N, -72.6713 W, 2674 m.a.s.l. | Lake fen. Very small peatland bottom of old lake with sedges | Polytrichum commune             | 12/25/09 | 5299 |
| PAM2 | PAM2_1  | Norte de Santander, Pamplona, Laguna del Seminarista. Small sedimented lake. 7.4083 N, -72.6429 W, 2475 m.a.s.l. | Lake fen. Small peatland in old lake basin                   | Sphagnum cf falciculatum Besch. | 12/27/09 | 5300 |
| YAR1 | YAR1_X1 | Antioquia, Santa Rosa de Osos, Llanos del Cuiba. 6.7565 N, -75.5082 W, 2764 m.a.s.l.                             | Stream fen. Very small peatland Sphagnum-dominated           |                                 | 2/28/10  | 5301 |
| YAR1 | YAR1_1  | Antioquia, Santa Rosa de Osos, Llanos del Cuiba. 6.7565 N, -75.5082 W, 2764 m.a.s.l.                             | Stream fen. Very small peatland Sphagnum-dominated           | Sphagnum sancto-josephense      | 2/28/10  | 5302 |
| YAR1 | YAR1_1  | Antioquia, Santa Rosa de Osos, Llanos del Cuiba. 6.7565 N, -75.5082 W, 2764 m.a.s.l.                             | Stream fen. Very small peatland Sphagnum-dominated           | Sphagnum sancto-josephense      | 2/28/10  | 5303 |
| YAR1 | YAR1_X2 | Antioquia, Santa Rosa de Osos, Llanos del Cuiba. 6.7565 N, -75.5082 W, 2764 m.a.s.l.                             | Stream fen. Very small peatland Sphagnum-dominated           |                                 | 2/28/10  | 5304 |
| TOL2 | TOL2_8  | Tolima, Anzoategui. Tolima Volcano. 4.6775 N, -75.3052 W, 4012 m.a.s.l.                                          | Stream fen. Raised between a stream fen and a slope fen      | Pernettya prostrata             | 4/25/09  | 5305 |
| TOL5 | TOL5_5  | Tolima, Anzoategui. Tolima Volcano. 4.6766 N, -75.3085 W, 4105 m.a.s.l.                                          | Lake fen. Lake fen on small lake (<1 ha) spill               | Anastrophyllum nigrescens       | 4/27/09  | 5306 |

|      |        |                                                                         |                                                                                                                                                             |                        |         |      |
|------|--------|-------------------------------------------------------------------------|-------------------------------------------------------------------------------------------------------------------------------------------------------------|------------------------|---------|------|
| TOL3 | TOL3_1 | Tolima, Anzoategui. Tolima Volcano. 4.676 N, −75.3038 W, 4046 m.a.s.l.  | Lake fen. Lake fed by a mix of underground volcanic water and runoff                                                                                        | Campylopus arctocarpus | 4/26/09 | 5307 |
| TOL1 | TOL1_4 | Tolima, Anzoategui. Tolima Volcano. 4.6779 N, −75.3014 W, 4010 m.a.s.l. | Stream fen. Stream fen on volcanic-fed spring                                                                                                               | Riccardia paramorum    | 4/25/09 | 5308 |
| TOL1 | TOL1_6 | Tolima, Anzoategui. Tolima Volcano. 4.6779 N, −75.3014 W, 4010 m.a.s.l. | Stream fen. Stream fen on volcanic-fed spring                                                                                                               | Campylium polygamum    | 4/25/09 | 5309 |
| TOL4 | TOL4_7 | Tolima, Anzoategui. Tolima Volcano. 4.6751 N, −75.3039 W, 4062 m.a.s.l. | Lake fen. Lake fen with cushions formed from vascular plants, distichia dominates at the center closest to the water and sphagnum and sedges near the shore | Campylopus andersonii  | 4/26/09 | 5310 |
| TOL4 | TOL4_7 | Tolima, Anzoategui. Tolima Volcano. 4.6751 N, −75.3039 W, 4062 m.a.s.l. | Lake fen. Lake fen with cushions formed from vascular plants, distichia dominates at the center closest to the water and sphagnum and sedges near the shore | Sphagnum magellanicum  | 4/26/09 | 5310 |
| TOL4 | TOL4_5 | Tolima, Anzoategui. Tolima Volcano. 4.6751 N, −75.3039 W, 4062 m.a.s.l. | Lake fen. Lake fen with cushions formed from vascular plants, distichia dominates at the center closest to the water and sphagnum and sedges near the shore | Campylopus nivalis     | 4/26/09 | 5311 |
| TOL4 | TOL4_5 | Tolima, Anzoategui. Tolima Volcano. 4.6751 N, −75.3039 W, 4062 m.a.s.l. | Lake fen. Lake fen with cushions formed from vascular plants, distichia dominates at the center closest to the water and sphagnum and sedges near the shore | Cephalozia sp          | 4/26/09 | 5311 |
| TOL4 | TOL4_5 | Tolima, Anzoategui. Tolima Volcano. 4.6751 N, −75.3039 W, 4062 m.a.s.l. | Lake fen. Lake fen with cushions formed from vascular plants, distichia dominates at the center closest to the water and sphagnum and sedges near the shore | Riccardia paramorum    | 4/26/09 | 5311 |
| TOL4 | TOL4_8 | Tolima, Anzoategui. Tolima Volcano. 4.6751 N, −75.3039 W, 4062 m.a.s.l. | Lake fen. Lake fen with cushions formed from vascular plants, distichia dominates                                                                           | Distichia muscoides    | 4/26/09 | 5312 |

|      |         |                                                                         |                                                                           |                              |         |      |
|------|---------|-------------------------------------------------------------------------|---------------------------------------------------------------------------|------------------------------|---------|------|
|      |         |                                                                         | at the center closest to the water and sphagnum and sedges near the shore |                              |         |      |
| TOL1 | TOL1_5  | Tolima, Anzoategui. Tolima Volcano. 4.6779 N, −75.3014 W, 4010 m.a.s.l. | Stream fen. Stream fen on volcanic-fed spring                             | Brachytecium austroglareosum | 4/25/09 | 5313 |
| TOL1 | TOL1_3  | Tolima, Anzoategui. Tolima Volcano. 4.6779 N, −75.3014 W, 4010 m.a.s.l. | Stream fen. Stream fen on volcanic-fed spring                             | Campylium polygamum          | 4/25/09 | 5314 |
| TOL1 | TOL1_3  | Tolima, Anzoategui. Tolima Volcano. 4.6779 N, −75.3014 W, 4010 m.a.s.l. | Stream fen. Stream fen on volcanic-fed spring                             | Polytrichum commune          | 4/25/09 | 5314 |
| TOL2 | TOL2_3  | Tolima, Anzoategui. Tolima Volcano. 4.6775 N, −75.3052 W, 4012 m.a.s.l. | Stream fen. Raised bog between a stream fen and a slope fen               | Riccardia paramorum          | 4/25/09 | 5315 |
| TOL2 | TOL2_3  | Tolima, Anzoategui. Tolima Volcano. 4.6775 N, −75.3052 W, 4012 m.a.s.l. | Stream fen. Raised bog between a stream fen and a slope fen               | Sphagnum tenerum             | 4/25/09 | 5315 |
| TOL2 | TOL2_1  | Tolima, Anzoategui. Tolima Volcano. 4.6775 N, −75.3052 W, 4012 m.a.s.l. | Stream fen. Raised bog between a stream fen and a slope fen               | Sphagnum tenerum             | 4/25/09 | 5316 |
| TOL1 | TOL1_9  | Tolima, Anzoategui. Tolima Volcano. 4.6779 N, −75.3014 W, 4010 m.a.s.l. | Stream fen. Stream fen on volcanic-fed spring                             | Bryum argenteum              | 4/25/09 | 5317 |
| TOL1 | TOL1_2  | Tolima, Anzoategui. Tolima Volcano. 4.6779 N, −75.3014 W, 4010 m.a.s.l. | Stream fen. Stream fen on volcanic-fed spring                             | Marchantia berteriana        | 4/25/09 | 5318 |
| TOL1 | TOL1_X1 | Tolima, Anzoategui. Tolima Volcano. 4.6779 N, −75.3014 W, 4010 m.a.s.l. | Stream fen. Stream fen on volcanic-fed spring                             |                              | 4/25/09 | 5319 |
| TOL1 | TOL1_X2 | Tolima, Anzoategui. Tolima Volcano. 4.6779 N, −75.3014 W, 4010 m.a.s.l. | Stream fen. Stream fen on volcanic-fed spring                             |                              | 4/25/09 | 5320 |
| TOL5 | TOL5_X3 | Tolima, Anzoategui. Tolima Volcano. 4.6766 N, −75.3085 W, 4105 m.a.s.l. | Lake fen. Lake fen on small lake (<1 ha) spill                            |                              | 4/27/09 | 5321 |
| TOL1 | TOL1_X4 | Tolima, Anzoategui. Tolima Volcano. 4.6779 N, −75.3014 W, 4010 m.a.s.l. | Stream fen. Stream fen on volcanic-fed spring                             |                              | 4/25/09 | 5322 |
| TOL2 | TOL2_X5 | Tolima, Anzoategui. Tolima Volcano. 4.6775 N, −75.3052 W, 4012 m.a.s.l. | Stream fen. Raised bog between a stream fen and a slope fen               |                              | 4/25/09 | 5323 |



|       |          |                                                                                                       |                                                                                                                   |                            |         |      |
|-------|----------|-------------------------------------------------------------------------------------------------------|-------------------------------------------------------------------------------------------------------------------|----------------------------|---------|------|
| TOL1  | TOL1_X6  | Tolima, Anzoategui. Tolima Volcano. 4.6779 N, −75.3014 W, 4010 m.a.s.l.                               | Stream fen. Stream fen on volcanic-fed spring                                                                     |                            | 4/25/09 | 5324 |
| TOL2  | TOL2_X7  | Tolima, Anzoategui. Tolima Volcano. 4.6775 N, −75.3052 W, 4012 m.a.s.l.                               | Stream fen. Raised bog between a stream fen and a slope fen                                                       |                            | 4/25/09 | 5325 |
| TOL1  | TOL1_X8  | Tolima, Anzoategui. Tolima Volcano. 4.6779 N, −75.3014 W, 4010 m.a.s.l.                               | Stream fen. Stream fen on volcanic-fed spring                                                                     |                            | 4/25/09 | 5326 |
| TOL1  | TOL1_X10 | Tolima, Anzoategui. Tolima Volcano. 4.6779 N, −75.3014 W, 4010 m.a.s.l.                               | Stream fen. Stream fen on volcanic-fed spring                                                                     |                            | 4/25/09 | 5327 |
| NEG1  | NEG1_4   | Caldas, Manizales, Laguna Negra at Entrance of PNN “Los Nevados”. 4.9804 N, −75.3376 W, 3904 m.a.s.l. | Lake fen. Fen in outlet if disturbed lake with evidence of flashfloods from glacier melting and volcano activity  | Sphagnum oxyphyllum        | 3/27/10 | 5328 |
| NEG2  | NEG2_1   | Caldas, Manizales, Laguna Negra at Entrance of PNN “Los Nevados”. 4.9802 N, −75.3376 W, 3904 m.a.s.l. | Lake fen. Fen in outlet if disturbed lake with evidence of flash floods from glacier melting and volcano activity | Ribes sp                   | 3/27/10 | 5329 |
| NEG3  | NEG3_2   | Caldas, Manizales, Laguna Negra at Entrance of PNN “Los Nevados”. 4.9803 N, −75.3378 W, 3905 m.a.s.l. | Lake fen. Fen in outlet if disturbed lake with evidence of flash floods from glacier melting and volcano activity | Sphagnum magellanicum      | 3/27/10 | 5330 |
| NEG3  | NEG3_3   | Caldas, Manizales, Laguna Negra at Entrance of PNN “Los Nevados”. 4.9803 N, −75.3378 W, 3905 m.a.s.l. | Lake fen. Fen in outlet if disturbed lake with evidence of flash floods from glacier melting and volcano activity | Lophozia sp                | 3/27/10 | 5331 |
| NEG3  | NEG3_8   | Caldas, Manizales, Laguna Negra at Entrance of PNN “Los Nevados”. 4.9803 N, −75.3378 W, 3905 m.a.s.l. | Lake fen. Fen in outlet if disturbed lake with evidence of flash floods from glacier melting and volcano activity | Lophozia sp2               | 3/27/10 | 5332 |
| LAVE1 | LAVE1_13 | Cundinamarca, Teusa, Paramo Laguna Verde, Lake eastward outlet. 5.2151 N, −74.0012 W, 3630 m.a.s.l.   | Lake fen. Peatland in old lake basin that is now part of the outlet, with large hummocks of vascular plant        | Sphagnum sancto-josephense | 3/15/10 | 5333 |

|       |          |                                                                                                     |                                                                                                            |                                 |         |      |
|-------|----------|-----------------------------------------------------------------------------------------------------|------------------------------------------------------------------------------------------------------------|---------------------------------|---------|------|
| LAVE1 | LAVE1_14 | Cundinamarca, Teusa, Paramo Laguna Verde, Lake eastward outlet. 5.2151 N, −74.0012 W, 3630 m.a.s.l. | Lake fen. Peatland in old lake basin that is now part of the outlet, with large hummocks of vascular plant | Isotachis sp                    | 3/15/10 | 5334 |
| LAVE1 | LAVE1_15 | Cundinamarca, Teusa, Paramo Laguna Verde, Lake eastward outlet. 5.2151 N, −74.0012 W, 3630 m.a.s.l. | Lake fen. Peatland in old lake basin that is now part of the outlet, with large hummocks of vascular plant | Riccardia paramorum             | 3/15/10 | 5335 |
| LAVE3 | LAVE3_10 | Cundinamarca, Teusa, Paramo Laguna Verde, North shore. 5.2174 N, −73.9963 W, 3623 m.a.s.l.          | Lake fen. Peatland in old lake basin that is now part of the outlet, with large hummocks of vascular plant | Bartramia sp                    | 3/16/10 | 5336 |
| BE11  | BE11_1   | Antioquia, Belmira, Paramo de Belmira, Sitio La Laguna. 6.6668 N, −75.6691 W, 3269 m.a.s.l.         | Stream fen. Large raised peatland in upland plateau                                                        | Symphyogyna sp                  | 2/24/10 | 5337 |
| BE11  | BE11_10  | Antioquia, Belmira, Paramo de Belmira, Sitio La Laguna. 6.6668 N, −75.6691 W, 3269 m.a.s.l.         | Stream fen. Large raised peatland in upland plateau                                                        | Sphagnum sancto-josephense      | 2/24/10 | 5338 |
| BE11  | BE11_11  | Antioquia, Belmira, Paramo de Belmira, Sitio La Laguna. 6.6668 N, −75.6691 W, 3269 m.a.s.l.         | Stream fen. Large raised peatland in upland plateau                                                        | Cephalozia sp                   | 2/24/10 | 5339 |
| BE11  | BE11_13  | Antioquia, Belmira, Paramo de Belmira, Sitio La Laguna. 6.6668 N, −75.6691 W, 3269 m.a.s.l.         | Stream fen. Large raised peatland in upland plateau                                                        | Hypnum cupressiforme            | 2/24/10 | 5340 |
| BE11  | BE11_14  | Antioquia, Belmira, Paramo de Belmira, Sitio La Laguna. 6.6668 N, −75.6691 W, 3269 m.a.s.l.         | Stream fen. Large raised peatland in upland plateau                                                        | Sphagnum cf falciculatum Besch. | 2/24/10 | 5341 |
| BE11  | BE11_15  | Antioquia, Belmira, Paramo de Belmira, Sitio La Laguna. 6.6668 N, −75.6691 W, 3269 m.a.s.l.         | Stream fen. Large raised peatland in upland plateau                                                        | Calypogeia sp                   | 2/24/10 | 5342 |

|      |         |                                                                                                                  |                                                                     |                                 |         |      |
|------|---------|------------------------------------------------------------------------------------------------------------------|---------------------------------------------------------------------|---------------------------------|---------|------|
| BE11 | BE11_16 | Antioquia, Belmira, Paramo de Belmira, Sitio La Laguna. 6.6668 N, -75.6691 W, 3269 m.a.s.l.                      | Stream fen. Large raised peatland in upland plateau                 | Telaranea nematodes             | 2/24/10 | 5343 |
| BE12 | BE12_1  | Antioquia, Belmira, Paramo de Belmira, Sitio La Laguna. 6.6719 N, -75.669 W, 3272 m.a.s.l.                       | Stream fen. Large raised peatland in upland plateau                 | Sphagnum cf falciculatum Besch. | 2/24/10 | 5344 |
| BE12 | BE12_6  | Antioquia, Belmira, Paramo de Belmira, Sitio La Laguna. 6.6719 N, -75.669 W, 3272 m.a.s.l.                       | Stream fen. Large raised peatland in upland plateau                 | Symphyogyna sp                  | 2/24/10 | 5345 |
| BE12 | BE12_7  | Antioquia, Belmira, Paramo de Belmira, Sitio La Laguna. 6.6719 N, -75.669 W, 3272 m.a.s.l.                       | Stream fen. Large raised peatland in upland plateau                 | Sphagnum oxyphyllum             | 2/24/10 | 5346 |
| BE8  | BE8_1   | Antioquia, Belmira. 6.6974 N, -75.6691 W, 3017 m.a.s.l.                                                          | Slope fen. Fen in extremely disturbed peatland in abandoned pasture | Sphagnum sancto-josephense      | 3/8/09  | 5347 |
| BE9  | BE9_1   | Antioquia, Belmira. 6.6974 N, -75.6691 W, 2989 m.a.s.l.                                                          | Slope fen. Fen in extremely disturbed peatland in abandoned pasture | Sphagnum sancto-josephense      | 3/8/09  | 5348 |
| CHI1 | CHI1_1  | Cundinamarca, Fomeque, PNN Chingaza, Heads of "Rio Frio", Laguna de Chingaza. 4.501 N, -73.7531 W, 3333 m.a.s.l. | Stream fen. Peatland in backwater floodplain from Rio Frio margins  | Sphagnum cundinamarcanum        | 3/12/10 | 5349 |
| CHI1 | CHI1_3  | Cundinamarca, Fomeque, PNN Chingaza, Heads of "Rio Frio", Laguna de Chingaza. 4.501 N, -73.7531 W, 3333 m.a.s.l. | Stream fen. Peatland in backwater floodplain from Rio Frio margins  | Hypnum cupressiforme            | 3/12/10 | 5350 |
| CHI1 | CHI1_4  | Cundinamarca, Fomeque, PNN Chingaza, Heads of "Rio Frio", Laguna de Chingaza. 4.501 N, -73.7531 W, 3333 m.a.s.l. | Stream fen. Peatland in backwater floodplain from Rio Frio margins  | Breutelia chrysea               | 3/12/10 | 5351 |

|      |         |                                                                                                                     |                                                                    |                                      |         |      |
|------|---------|---------------------------------------------------------------------------------------------------------------------|--------------------------------------------------------------------|--------------------------------------|---------|------|
| CHI1 | CHI1_7  | Cundinamarca, Fomeque, PNN Chingaza, Heads of "Rio Frio", Laguna de Chingaza. 4.501 N, -73.7531 W, 3333 m.a.s.l.    | Stream fen. Peatland in backwater floodplain from Rio Frio margins | <i>lachemilla orbicularis</i>        | 3/12/10 | 5352 |
| CHI2 | CHI2_4  | Cundinamarca, Fomeque, PNN Chingaza, Heads of "Rio Frio", Laguna de Chingaza. 4.5026 N, -73.7523 W, 3328 m.a.s.l.   | Stream fen. Peatland in backwater floodplain from Rio Frio margins | <i>Drepanocladus aduncus</i>         | 3/12/10 | 5353 |
| CHI3 | CHI3_1  | Cundinamarca, Fomeque, PNN Chingaza, Peatland on margins of Laguna de Chingaza. 4.5214 N, -73.7496 W, 3180 m.a.s.l. | Lake fen. Peatland in old lake basin                               | <i>Sphagnum sancto-josephense</i>    | 3/13/10 | 5354 |
| CHI3 | CHI3_2  | Cundinamarca, Fomeque, PNN Chingaza, Peatland on margins of Laguna de Chingaza. 4.5214 N, -73.7496 W, 3180 m.a.s.l. | Lake fen. Peatland in old lake basin                               | <i>Polytrichum commune</i>           | 3/13/10 | 5355 |
| CHI3 | CHI3_5  | Cundinamarca, Fomeque, PNN Chingaza, Peatland on margins of Laguna de Chingaza. 4.5214 N, -73.7496 W, 3180 m.a.s.l. | Lake fen. Peatland in old lake basin                               | <i>Drepanocladus aduncus</i>         | 3/13/10 | 5356 |
| CHI3 | CHI3_8  | Cundinamarca, Fomeque, PNN Chingaza, Peatland on margins of Laguna de Chingaza. 4.5214 N, -73.7496 W, 3180 m.a.s.l. | Lake fen. Peatland in old lake basin                               | <i>Drepanocladus longifolius</i>     | 3/13/10 | 5357 |
| CHI3 | CHI3_11 | Cundinamarca, Fomeque, PNN Chingaza, Peatland on margins of Laguna de Chingaza. 4.5214 N, -73.7496 W, 3180 m.a.s.l. | Lake fen. Peatland in old lake basin                               | <i>Brachytectium austroglareosum</i> | 3/13/10 | 5358 |

|      |         |                                                                                                                                   |                                                     |                        |         |      |
|------|---------|-----------------------------------------------------------------------------------------------------------------------------------|-----------------------------------------------------|------------------------|---------|------|
| CHI3 | CHI3_14 | Cundinamarca, Fomeque, PNN Chingaza, Peatland on margins of Laguna de Chingaza. 4.5214 N, -73.7496 W, 3180 m.a.s.l.               | Lake fen. Peatland in old lake basin                | Pohlia papillosa       | 3/13/10 | 5359 |
| CHI4 | CHI4_2  | Cundinamarca, Fomeque, PNN Chingaza, Peatland on margins of Laguna de Chingaza. 4.5189 N, -73.7493 W, 3185 m.a.s.l.               | Lake fen. Peatland in old lake basin                | Noteroclada confluens  | 3/13/10 | 5360 |
| CHI4 | CHI4_6  | Cundinamarca, Fomeque, PNN Chingaza, Peatland on margins of Laguna de Chingaza. 4.5189 N, -73.7493 W, 3185 m.a.s.l.               | Lake fen. Peatland in old lake basin                | Fossombronina sp       | 3/13/10 | 5361 |
| CHI4 | CHI4_12 | Cundinamarca, Fomeque, PNN Chingaza, Peatland on margins of Laguna de Chingaza. 4.5189 N, -73.7493 W, 3185 m.a.s.l.               | Lake fen. Peatland in old lake basin                | Marchantia berteroaana | 3/13/10 | 5362 |
| CHI5 | CHI5_7  | Cundinamarca, Fomeque, PNN Chingaza, Peatland on Espeletia Valley “Valle De Los Frailejones”. 4.528 N, -73.7683 W, 3190 m.a.s.l.  | Slope fen. Peatland in large valley in gentle slope | Riccardia paramorum    | 3/13/10 | 5363 |
| CHI5 | CHI5_8  | Cundinamarca, Fomeque, PNN Chingaza, Peatland on Espeletia Valley “Valle De Los Frailejones”. 4.528 N, -73.7683 W, 3190 m.a.s.l.  | Slope fen. Peatland in large valley in gentle slope | Cephalozia sp          | 3/13/10 | 5364 |
| CHI6 | CHI6_5  | Cundinamarca, Fomeque, PNN Chingaza, Peatland on Espeletia Valley “Valle De Los Frailejones”. 4.5319 N, -73.7644 W, 3183 m.a.s.l. | Slope fen. Peatland in large valley in gentle slope | Lophocolea sp          | 3/13/10 | 5365 |

|      |         |                                                                                                                                   |                                                                                  |                            |         |      |
|------|---------|-----------------------------------------------------------------------------------------------------------------------------------|----------------------------------------------------------------------------------|----------------------------|---------|------|
| CHI7 | CHI7_13 | Cundinamarca, Fomeque, PNN Chingaza, Peatland on Espeletia Valley "Valle De Los Frailejones". 4.5358 N, -73.7636 W, 3182 m.a.s.l. | Slope fen. Peatland in large valley in gentle slope mix with very fine sediments | Sphagnum oxyphyllum        | 3/13/10 | 5366 |
| CHI8 | CHI8_10 | Cundinamarca, Fomeque, PNN Chingaza, Peatland on Espeletia Valley "Valle De Los Frailejones". 4.5308 N, -73.7693 W, 3188 m.a.s.l. | Slope fen. Peatland in large valley in gentle slope                              | Riccardia paramorum        | 3/14/10 | 5367 |
| CHI8 | CHI8_18 | Cundinamarca, Fomeque, PNN Chingaza, Peatland on Espeletia Valley "Valle De Los Frailejones". 4.5308 N, -73.7693 W, 3188 m.a.s.l. | Slope fen. Peatland in large valley in gentle slope                              | Cephalozia sp              | 3/14/10 | 5368 |
| CHI9 | CHI9_4  | Cundinamarca, Fomeque, PNN Chingaza, Peatland on west side of "Valle De Los Frailejones". 4.5299 N, -73.7678 W, 3184 m.a.s.l.     | Slope fen. Peatland in large valley in gentle slope                              | Sphagnum magellanicum      | 3/14/10 | 5369 |
| CHI9 | CHI9_5  | Cundinamarca, Fomeque, PNN Chingaza, Peatland on west side of "Valle De Los Frailejones". 4.5299 N, -73.7678 W, 3184 m.a.s.l.     | Slope fen. Peatland in large valley in gentle slope                              | Polytrichum commune        | 3/14/10 | 5370 |
| CHI9 | CHI9_9  | Cundinamarca, Fomeque, PNN Chingaza, Peatland on west side of "Valle De Los Frailejones". 4.5299 N, -73.7678 W, 3184 m.a.s.l.     | Slope fen. Peatland in large valley in gentle slope                              | Telaranea nematodes        | 3/14/10 | 5371 |
| COC2 | COC2_5  | Boyaca, Guican. Valle de los cojines. 6.4786 N, -72.2785 W, 4202 m.a.s.l.                                                         | Stream fen. Large fen with cushion plants                                        | Marsupella sp              | 1/6/10  | 5372 |
| COC2 | COC2_5  | Boyaca, Guican. Valle de los cojines. 6.4786 N, -72.2785 W, 4202 m.a.s.l.                                                         | Stream fen. Large fen with cushion plants                                        | Trichostomum brachydontium | 1/6/10  | 5372 |

|      |         |                                                                           |                                                                                                        |                              |         |      |
|------|---------|---------------------------------------------------------------------------|--------------------------------------------------------------------------------------------------------|------------------------------|---------|------|
| COC8 | COC8_19 | Boyaca, Guican. Valle de los cojines. 6.4699 N, −72.2776 W, 4230 m.a.s.l. | Stream fen. Large fen with cushion plants in between the two streams on the south side of the complex  | Hymenostylium recurvirostrum | 1/8/10  | 5373 |
| COC9 | COC9_23 | Boyaca, Guican. Valle de los cojines. 6.4763 N, −72.2792 W, 4214 m.a.s.l. | Stream fen. Fen on floodplain of stream dominated by grasses and sedges with mineral soil mixed        | Leptodontium luteum          | 1/8/10  | 5374 |
| COC9 | COC9_24 | Boyaca, Guican. Valle de los cojines. 6.4763 N, −72.2792 W, 4214 m.a.s.l. | Stream fen. Fen on floodplain of stream dominated by grasses and sedges with mineral soil mixed        | Thuidium peruvianum          | 1/8/10  | 5375 |
| COC9 | COC9_26 | Boyaca, Guican. Valle de los cojines. 6.4763 N, −72.2792 W, 4214 m.a.s.l. | Stream fen. Fen on floodplain of stream dominated by grasses and sedges with mineral soil mixed        | Pohlia papillosa             | 1/8/10  | 5376 |
| MA1  | MA1_3   | Mamapacha, lake “La Tarea”. 5.1918 N, −73.2649 W, 3059 m.a.s.l.           | Slope fen. Lake fen, 50 m W from lake. Lake water level was raised around 8 m 10 years ago with a dam. | Riccardia paramorum          | 2/17/09 | 3852 |
| MA1  | MA1_3   | Mamapacha, lake “La Tarea”. 5.1918 N, −73.2649 W, 3059 m.a.s.l.           | Slope fen. Lake fen, 50 m W from lake. Lake water level was raised around 8 m 10 years ago with a dam. | Riccardia paramorum          | 2/17/09 | 3878 |
| MA1  | MA1_4   | Mamapacha, lake “La Tarea”. 5.1918 N, −73.2649 W, 3059 m.a.s.l.           | Slope fen. Lake fen, 50 m W from lake. Lake water level was raised around 8 m 10 years ago with a dam. | Sphagnum sp                  | 2/17/09 | 3853 |
| MA1  | MA1_4   | Mamapacha, lake “La Tarea”. 5.1918 N, −73.2649 W, 3059 m.a.s.l.           | Slope fen. Lake fen, 50 m W from lake. Lake water level was raised around 8 m 10 years ago with a dam. | Sphagnum sp                  | 2/17/09 | 3879 |
| MA1  | MA1_5   | Mamapacha, lake “La Tarea”. 5.1918 N, −73.2649 W, 3059 m.a.s.l.           | Slope fen. Lake fen, 50 m W from lake. Lake water level was raised around 8 m 10 years ago with a dam. | Thuidium peruvianum          | 2/17/09 | 3854 |

|      |         |                                                                 |                                                                                                        |                               |         |      |
|------|---------|-----------------------------------------------------------------|--------------------------------------------------------------------------------------------------------|-------------------------------|---------|------|
| MA1  | MA1_5   | Mamapacha, lake “La Tarea”. 5.1918 N, −73.2649 W, 3059 m.a.s.l. | Slope fen. Lake fen, 50 m W from lake. Lake water level was raised around 8 m 10 years ago with a dam. | Thuidium peruvianum           | 2/17/09 | 3880 |
| MA1  | MA1_6   | Mamapacha, lake “La Tarea”. 5.1918 N, −73.2649 W, 3059 m.a.s.l. | Slope fen. Lake fen, 50 m W from lake. Lake water level was raised around 8 m 10 years ago with a dam. | Frullania sp                  | 2/17/09 | 3881 |
| MA1  | MA1_6   | Mamapacha, lake “La Tarea”. 5.1918 N, −73.2649 W, 3059 m.a.s.l. | Slope fen. Lake fen, 50 m W from lake. Lake water level was raised around 8 m 10 years ago with a dam. | Frullania sp                  | 2/17/09 | 3855 |
| MA1  | MA1_7   | Mamapacha, lake “La Tarea”. 5.1918 N, −73.2649 W, 3059 m.a.s.l. | Slope fen. Lake fen, 50 m W from lake. Lake water level was raised around 8 m 10 years ago with a dam. | Breutelia chrysea             | 2/17/09 | 3856 |
| MA1  | MA1_7   | Mamapacha, lake “La Tarea”. 5.1918 N, −73.2649 W, 3059 m.a.s.l. | Slope fen. Lake fen, 50 m W from lake. Lake water level was raised around 8 m 10 years ago with a dam. | Breutelia chrysea             | 2/17/09 | 3882 |
| MA1  | MA1_10  | Mamapacha, lake “La Tarea”. 5.1918 N, −73.2649 W, 3059 m.a.s.l. | Slope fen. Lake fen, 50 m W from lake. Lake water level was raised around 8 m 10 years ago with a dam. | Bartramia sp                  | 2/17/09 | 3859 |
| MA1  | MA1_10  | Mamapacha, lake “La Tarea”. 5.1918 N, −73.2649 W, 3059 m.a.s.l. | Slope fen. Lake fen, 50 m W from lake. Lake water level was raised around 8 m 10 years ago with a dam. | Bartramia sp                  | 2/17/09 | 3885 |
| MA10 | MA10_7  | Mamapacha, lake “Los Patos”. 5.1876 N, −73.272 W, 3145 m.a.s.l. | Stream fen. Stream fen on spill of Lake los patos                                                      | Brachytectium austroglareosum | 2/22/09 | 3929 |
| MA10 | MA10_8  | Mamapacha, lake “Los Patos”. 5.1876 N, −73.272 W, 3145 m.a.s.l. | Stream fen. Stream fen on spill of Lake los patos                                                      | Aneura sp                     | 2/22/09 | 3930 |
| MA10 | MA10_10 | Mamapacha, lake “Los Patos”. 5.1876 N, −73.272 W, 3145 m.a.s.l. | Stream fen. Stream fen on spill of Lake los patos                                                      | Marchantia berteriana         | 2/22/09 | 3932 |



|      |         |                                                                                  |                                                                                                             |                        |         |      |
|------|---------|----------------------------------------------------------------------------------|-------------------------------------------------------------------------------------------------------------|------------------------|---------|------|
| MA11 | MA11_21 | Mamapacha, 300 m from way to Lake Lajadilla. 5.1864 N, -73.2701 W, 3180 m.a.s.l. | Slope fen. Small fen at outlet of small watershed less than 5 ha                                            | Anastrophyllum sp      | 2/22/09 | 3934 |
| MA2  | MA2_8   | Mamapacha, lake "La Tarea". 5.1918 N, -75.2652 W, 3061 m.a.s.l.                  | Slope fen. Slope fen similar to MA1 with sphagnum in the hollows and chusquea forming hummocks              | Moss                   | 2/17/09 | 3887 |
| MA3  | MA3_4   | Mamapacha, lake "La Tarea". 5.19 N, -73.2639 W, 3064 m.a.s.l.                    | Lake fen. Lake fen, floating mat on lake anchored to rock outcrop                                           | Cephalozia sp          | 2/18/09 | 3888 |
| MA3  | MA3_7   | Mamapacha, lake "La Tarea". 5.19 N, -73.2639 W, 3064 m.a.s.l.                    | Lake fen. Lake fen, floating mat on lake anchored to rock outcrop                                           | Herbertus divergens    | 2/18/09 | 3889 |
| MA3  | MA3_11  | Mamapacha, lake "La Tarea". 5.19 N, -73.2639 W, 3064 m.a.s.l.                    | Lake fen. Lake fen, floating mat on lake anchored to rock outcrop                                           | Isotachis sp           | 2/18/09 | 3890 |
| MA3  | MA3_15  | Mamapacha, lake "La Tarea". 5.19 N, -73.2639 W, 3064 m.a.s.l.                    | Lake fen. Lake fen, floating mat on lake anchored to rock outcrop                                           | Campylopus arctocarpus | 2/18/09 | 3891 |
| MA4  | MA4_5   | Mamapacha, lake "La Tarea". 5.1895 N, -73.2639 W, 3064 m.a.s.l.                  | Lake fen. Lake fen, floating mat on lake anchored to rock outcrop                                           | Drepanocladus aduncus  | 2/18/09 | 3892 |
| MA4  | MA4_12  | Mamapacha, lake "La Tarea". 5.1895 N, -73.2639 W, 3064 m.a.s.l.                  | Lake fen. Lake fen, floating mat on lake anchored to rock outcrop                                           | Plachiochila sp        | 2/18/09 | 3893 |
| MA5  | MA5_2   | Mamapacha, lake "Los Patos". 5.1899 N, -73.2736 W, 3154 m.a.s.l.                 | Lake fen. Fen with chusquea similar to a forested fen but with chusquea                                     | Sphagnum sp            | 2/19/09 | 3894 |
| MA5  | MA5_6   | Mamapacha, lake "Los Patos". 5.1899 N, -73.2736 W, 3154 m.a.s.l.                 | Lake fen. Fen with chusquea similar to a forested fen but with chusquea                                     | Dicranella sp          | 2/19/09 | 3895 |
| MA5  | MA5_7   | Mamapacha, lake "Los Patos". 5.1899 N, -73.2736 W, 3154 m.a.s.l.                 | Lake fen. Fen with chusquea similar to a forested fen but with chusquea                                     | Campylopus arctocarpus | 2/19/09 | 3896 |
| MA6  | MA6_6   | Mamapacha, lake "Los Patos". 5.1902 N, -73.2743 W, 3155 m.a.s.l.                 | Lake fen. Fen with chusquea similar to a forested fen but with chusquea, drier than MA5. Just 50 m from MA5 | Breutelia chrysea      | 2/19/09 | 4052 |

|     |        |                                                                  |                                                                                                                                                  |                           |         |      |
|-----|--------|------------------------------------------------------------------|--------------------------------------------------------------------------------------------------------------------------------------------------|---------------------------|---------|------|
| MA6 | MA6_7  | Mamapacha, lake “Los Patos”. 5.1902 N, -73.2743 W, 3155 m.a.s.l. | Lake fen. Fen with chusquea similar to a forested fen but with chusquea, drier than MA5. Just 50 m from MA5                                      | Aneura sp                 | 2/19/09 | 3897 |
| MA6 | MA6_8  | Mamapacha, lake “Los Patos”. 5.1902 N, -73.2743 W, 3155 m.a.s.l. | Lake fen. Fen with chusquea similar to a forested fen but with chusquea, drier than MA5. Just 50 m from MA5                                      | Adelanthus pittieri       | 2/19/09 | 3898 |
| MA6 | MA6_9  | Mamapacha, lake “Los Patos”. 5.1902 N, -73.2743 W, 3155 m.a.s.l. | Lake fen. Fen with chusquea similar to a forested fen but with chusquea, drier than MA5. Just 50 m from MA5                                      | Odontoschisma sp          | 2/19/09 | 3899 |
| MA6 | MA6_14 | Mamapacha, lake “Los Patos”. 5.1902 N, -73.2743 W, 3155 m.a.s.l. | Lake fen. Fen with chusquea similar to a forested fen but with chusquea, drier than MA5. Just 50 m from MA5                                      | Anastrophyllum nigrescens | 2/19/09 | 4062 |
| MA6 | MA6_14 | Mamapacha, lake “Los Patos”. 5.1902 N, -73.2743 W, 3155 m.a.s.l. | Lake fen. Fen with chusquea similar to a forested fen but with chusquea, drier than MA5. Just 50 m from MA5                                      | Anastrophyllum nigrescens | 2/19/09 | 3900 |
| MA6 | MA6_18 | Mamapacha, lake “Los Patos”. 5.1902 N, -73.2743 W, 3155 m.a.s.l. | Lake fen. Fen with chusquea similar to a forested fen but with chusquea, drier than MA5. Just 50 m from MA5                                      | Lepidozia sp              | 2/19/09 | 3901 |
| MA6 | MA6_21 | Mamapacha, lake “Los Patos”. 5.1902 N, -73.2743 W, 3155 m.a.s.l. | Lake fen. Fen with chusquea similar to a forested fen but with chusquea, drier than MA5. Just 50 m from MA5                                      | Lepidozia sp              | 2/19/09 | 3902 |
| MA6 | MA6_25 | Mamapacha, lake “Los Patos”. 5.1902 N, -73.2743 W, 3155 m.a.s.l. | Lake fen. Fen with chusquea similar to a forested fen but with chusquea, drier than MA5. Just 50 m from MA5                                      | Riccardia paramorum       | 2/19/09 | 3905 |
| MA7 | MA7_1  | Mamapacha. 5.197 N, -73.2732 W, 3154 m.a.s.l.                    | Lake fen. Fen dominated by sedges, with very little sphagnum. Small stream running through it and wide hummocks of chusquea over 2 m in diameter | Campylopus arctocarpus    | 2/20/09 | 3908 |

|     |        |                                                                  |                                                                                                                                                  |                     |         |      |
|-----|--------|------------------------------------------------------------------|--------------------------------------------------------------------------------------------------------------------------------------------------|---------------------|---------|------|
| MA7 | MA7_2  | Mamapacha. 5.197 N, −73.2732 W, 3154 m.a.s.l.                    | Lake fen. Fen dominated by sedges, with very little sphagnum. Small stream running through it and wide hummocks of chusquea over 2 m in diameter | Breutelia chrysea   | 2/20/09 | 3909 |
| MA7 | MA7_7  | Mamapacha. 5.197 N, −73.2732 W, 3154 m.a.s.l.                    | Lake fen. Fen dominated by sedges, with very little sphagnum. Small stream running through it and wide hummocks of chusquea over 2 m in diameter | Herbertus divergens | 2/20/09 | 3910 |
| MA7 | MA7_9  | Mamapacha. 5.197 N, −73.2732 W, 3154 m.a.s.l.                    | Lake fen. Fen dominated by sedges, with very little sphagnum. Small stream running through it and wide hummocks of chusquea over 2 m in diameter | Riccardia paramorum | 2/20/09 | 3912 |
| MA7 | MA7_13 | Mamapacha. 5.197 N, −73.2732 W, 3154 m.a.s.l.                    | Lake fen. Fen dominated by sedges, with very little sphagnum. Small stream running through it and wide hummocks of chusquea over 2 m in diameter | Dicranella sp       | 2/20/09 | 3914 |
| MA7 | MA7_21 | Mamapacha. 5.197 N, −73.2732 W, 3154 m.a.s.l.                    | Lake fen. Fen dominated by sedges, with very little sphagnum. Small stream running through it and wide hummocks of chusquea over 2 m in diameter | Nardia succulenta   | 2/20/09 | 3919 |
| MA7 | MA7_23 | Mamapacha. 5.197 N, −73.2732 W, 3154 m.a.s.l.                    | Lake fen. Fen dominated by sedges, with very little sphagnum. Small stream running through it and wide hummocks of chusquea over 2 m in diameter | Bryum laevigatum    | 2/20/09 | 3920 |
| MA8 | MA8_10 | Mamapacha, Lake “Lajadilla”. 5.1842 N, −73.2749 W, 3240 m.a.s.l. | Stream fen. Small fen near to Lajadilla lake, fen formed by ridge stopping the flow of water towards the lake                                    | Plachiochila sp     | 2/21/09 | 3922 |

|      |         |                                                                                                        |                                                                                                               |                           |         |      |
|------|---------|--------------------------------------------------------------------------------------------------------|---------------------------------------------------------------------------------------------------------------|---------------------------|---------|------|
| MA8  | MA8_13  | Mamapacha, Lake "Lajadilla". 5.1842 N, -73.2749 W, 3240 m.a.s.l.                                       | Stream fen. Small fen near to Lajadilla lake, fen formed by ridge stopping the flow of water towards the lake | Bazzania sp               | 2/21/09 | 3924 |
| MA8  | MA8_14  | Mamapacha, Lake "Lajadilla". 5.1842 N, -73.2749 W, 3240 m.a.s.l.                                       | Stream fen. Small fen near to Lajadilla lake, fen formed by ridge stopping the flow of water towards the lake | Anastrophyllum nigrescens | 2/21/09 | 3925 |
| MA9  | MA9_18  | Mamapacha, Lake "Lajadilla". 5.1928 N, -73.2724 W, 3238 m.a.s.l.                                       | Stream fen. Small fen near to Lajadilla lake, fen formed by ridge stopping the flow of water towards the lake | Moss                      | 2/21/09 | 3928 |
| SUM1 | SUM1_2  | Sumapaz. Road to Nazareth. Fen close to trout fishery at roadside. 4.2594 N, -74.1882 W, 3526 m.a.s.l. | Slope fen. Slope fen with a small stream (< 10 cm wide) running through                                       | Breutelia chrysea         | 1/27/09 | 3935 |
| SUM1 | SUM1_2  | Sumapaz. Road to Nazareth. Fen close to trout fishery at roadside. 4.2594 N, -74.1882 W, 3526 m.a.s.l. | Slope fen. Slope fen with a small stream (< 10 cm wide) running through                                       | Breutelia chrysea         | 1/27/09 | 4056 |
| SUM1 | SUM1_3  | Sumapaz. Road to Nazareth. Fen close to trout fishery at roadside. 4.2594 N, -74.1882 W, 3526 m.a.s.l. | Slope fen. Slope fen with a small stream (< 10 cm wide) running through                                       | Campylopus andersonii     | 1/27/09 | 3936 |
| SUM1 | SUM1_3  | Sumapaz. Road to Nazareth. Fen close to trout fishery at roadside. 4.2594 N, -74.1882 W, 3526 m.a.s.l. | Slope fen. Slope fen with a small stream (< 10 cm wide) running through                                       | Campylopus andersonii     | 1/27/09 | 4057 |
| SUM1 | SUM1_8  | Sumapaz. Road to Nazareth. Fen close to trout fishery at roadside. 4.2594 N, -74.1882 W, 3526 m.a.s.l. | Slope fen. Slope fen with a small stream (< 10 cm wide) running through                                       | Marchantia berteriana     | 1/27/09 | 3940 |
| SUM1 | SUM1_11 | Sumapaz. Road to Nazareth. Fen close to trout fishery at roadside. 4.2594 N, -74.1882 W, 3526 m.a.s.l. | Slope fen. Slope fen with a small stream (< 10 cm wide) running through                                       | Hypnum cupressiforme      | 1/27/09 | 3943 |

|       |          |                                                                                                        |                                                                                  |                              |         |      |
|-------|----------|--------------------------------------------------------------------------------------------------------|----------------------------------------------------------------------------------|------------------------------|---------|------|
| SUM1  | SUM1_13  | Sumapaz. Road to Nazareth. Fen close to trout fishery at roadside. 4.2594 N, -74.1882 W, 3526 m.a.s.l. | Slope fen. Slope fen with a small stream (< 10 cm wide) running through          | Warnstorfia exannulata       | 1/27/09 | 3945 |
| SUM11 | SUM11_4  | Sumapaz. Road to Nazareth. Fen close to trout fishery at roadside. 4.2759 N, -74.1969 W, 3686 m.a.s.l. | Stream fen. Sphagnum blankets in river floodplain extending until valley margins | Polytrichum commune          | 2/1/09  | 4010 |
| SUM13 | SUM13_8  | Sumapaz. Road to Nazareth. Fen close to trout fishery at roadside. 4.3172 N, -74.2056 W, 3580 m.a.s.l. | Slope fen.                                                                       | Thuidium peruvianum          | 2/2/09  | 4014 |
| SUM13 | SUM13_17 | Sumapaz. Road to Nazareth. Fen close to trout fishery at roadside. 4.3172 N, -74.2056 W, 3580 m.a.s.l. | Slope fen.                                                                       | Nardia succulenta            | 2/2/09  | 4015 |
| SUM14 | SUM14_18 | Sumapaz. Road to Nazareth. Fen close to trout fishery at roadside. 4.3172 N, -74.2056 W, 3530 m.a.s.l. | Slope fen.                                                                       | Brachytecium austroglareosum | 2/3/09  | 4019 |
| SUM2  | SUM2_1   | Sumapaz. Road to Nazareth. Fen close to trout fishery at roadside. 4.2613 N, -74.1909 W, 3552 m.a.s.l. | Slope fen. Slope fen with a small stream (< 10 cm wide) running through          | Campylopus arctocarpus       | 1/27/09 | 3946 |
| SUM2  | SUM2_3   | Sumapaz. Road to Nazareth. Fen close to trout fishery at roadside. 4.2613 N, -74.1909 W, 3552 m.a.s.l. | Slope fen. Slope fen with a small stream (< 10 cm wide) running through          | Sphagnum sancto-josephense   | 1/27/09 | 3947 |
| SUM2  | SUM2_8   | Sumapaz. Road to Nazareth. Fen close to trout fishery at roadside. 4.2613 N, -74.1909 W, 3552 m.a.s.l. | Slope fen. Slope fen with a small stream (< 10 cm wide) running through          | Drepanocladus aduncus        | 1/27/09 | 3949 |
| SUM2  | SUM2_10  | Sumapaz. Road to Nazareth. Fen close to trout fishery at roadside. 4.2613 N, -74.1909 W, 3552 m.a.s.l. | Slope fen. Slope fen with a small stream (< 10 cm wide) running through          | Lophocolea sp2               | 1/27/09 | 3950 |

|      |         |                                                                                                        |                                                                         |                           |         |      |
|------|---------|--------------------------------------------------------------------------------------------------------|-------------------------------------------------------------------------|---------------------------|---------|------|
| SUM2 | SUM2_12 | Sumapaz. Road to Nazareth. Fen close to trout fishery at roadside. 4.2613 N, -74.1909 W, 3552 m.a.s.l. | Slope fen. Slope fen with a small stream (< 10 cm wide) running through | Sphagnum magellanicum     | 1/27/09 | 3952 |
| SUM2 | SUM2_13 | Sumapaz. Road to Nazareth. Fen close to trout fishery at roadside. 4.2613 N, -74.1909 W, 3552 m.a.s.l. | Slope fen. Slope fen with a small stream (< 10 cm wide) running through | Sphagnum cundinamarcanum  | 1/27/09 | 3953 |
| SUM2 | SUM2_15 | Sumapaz. Road to Nazareth. Fen close to trout fishery at roadside. 4.2613 N, -74.1909 W, 3552 m.a.s.l. | Slope fen. Slope fen with a small stream (< 10 cm wide) running through | Riccardia paramorum       | 1/27/09 | 3954 |
| SUM3 | SUM3_3  | Sumapaz. Road to Nazareth. Fen close to trout fishery at roadside. 4.2759 N, -74.1969 W, 3569 m.a.s.l. | Slope fen.                                                              | Breutelia chrysea         | 1/28/09 | 3955 |
| SUM3 | SUM3_5  | Sumapaz. Road to Nazareth. Fen close to trout fishery at roadside. 4.2759 N, -74.1969 W, 3569 m.a.s.l. | Slope fen.                                                              | Sphagnum rio-negrense     | 1/28/09 | 3957 |
| SUM3 | SUM3_11 | Sumapaz. Road to Nazareth. Fen close to trout fishery at roadside. 4.2759 N, -74.1969 W, 3569 m.a.s.l. | Slope fen.                                                              | Cephalozia sp             | 1/28/09 | 3959 |
| SUM3 | SUM3_12 | Sumapaz. Road to Nazareth. Fen close to trout fishery at roadside. 4.2759 N, -74.1969 W, 3569 m.a.s.l. | Slope fen.                                                              | Calliergon stramineum     | 1/28/09 | 3960 |
| SUM3 | SUM3_13 | Sumapaz. Road to Nazareth. Fen close to trout fishery at roadside. 4.2759 N, -74.1969 W, 3569 m.a.s.l. | Slope fen.                                                              | Stephaniella paraphyllina | 1/28/09 | 3961 |
| SUM3 | SUM3_14 | Sumapaz. Road to Nazareth. Fen close to trout fishery at roadside. 4.2759 N, -74.1969 W, 3569 m.a.s.l. | Slope fen.                                                              | Cephalozia sp             | 1/28/09 | 3962 |

|      |         |                                                                                                        |            |                           |         |      |
|------|---------|--------------------------------------------------------------------------------------------------------|------------|---------------------------|---------|------|
| SUM3 | SUM3_19 | Sumapaz. Road to Nazareth. Fen close to trout fishery at roadside. 4.2759 N, -74.1969 W, 3569 m.a.s.l. | Slope fen. | Moss                      | 1/28/09 | 3964 |
| SUM3 | SUM3_20 | Sumapaz. Road to Nazareth. Fen close to trout fishery at roadside. 4.2759 N, -74.1969 W, 3569 m.a.s.l. | Slope fen. | Campylopus andersonii     | 1/28/09 | 3965 |
| SUM3 | SUM3_21 | Sumapaz. Road to Nazareth. Fen close to trout fishery at roadside. 4.2759 N, -74.1969 W, 3569 m.a.s.l. | Slope fen. | Bryum laevigatum          | 1/28/09 | 3966 |
| SUM4 | SUM4_2  | Sumapaz. Road to Nazareth. Fen close to trout fishery at roadside. 4.2759 N, -74.1969 W, 3667 m.a.s.l. | Slope fen. | Campylopus arctocarpus    | 1/28/09 | 3967 |
| SUM4 | SUM4_5  | Sumapaz. Road to Nazareth. Fen close to trout fishery at roadside. 4.2759 N, -74.1969 W, 3667 m.a.s.l. | Slope fen. | Riccardia paramorum       | 1/28/09 | 3969 |
| SUM4 | SUM4_6  | Sumapaz. Road to Nazareth. Fen close to trout fishery at roadside. 4.2759 N, -74.1969 W, 3667 m.a.s.l. | Slope fen. | Sphagnum compactum        | 1/28/09 | 3970 |
| SUM4 | SUM4_9  | Sumapaz. Road to Nazareth. Fen close to trout fishery at roadside. 4.2759 N, -74.1969 W, 3667 m.a.s.l. | Slope fen. | Anastrophyllum nigrescens | 1/28/09 | 3971 |
| SUM4 | SUM4_11 | Sumapaz. Road to Nazareth. Fen close to trout fishery at roadside. 4.2759 N, -74.1969 W, 3667 m.a.s.l. | Slope fen. | Jamesoniella rubricaulis  | 1/28/09 | 3972 |
| SUM4 | SUM4_14 | Sumapaz. Road to Nazareth. Fen close to trout fishery at roadside. 4.2759 N, -74.1969 W, 3667 m.a.s.l. | Slope fen. | Lycopodiella glaucescens  | 1/28/09 | 3973 |

|      |         |                                                                                                        |                                                                            |                            |         |      |
|------|---------|--------------------------------------------------------------------------------------------------------|----------------------------------------------------------------------------|----------------------------|---------|------|
| SUM5 | SUM5_1  | Sumapaz. Road to Nazareth. Fen close to trout fishery at roadside. 4.2759 N, -74.1969 W, 3415 m.a.s.l. | Slope fen.                                                                 | Sphagnum sancto-josephense | 1/29/09 | 3974 |
| SUM5 | SUM5_10 | Sumapaz. Road to Nazareth. Fen close to trout fishery at roadside. 4.2759 N, -74.1969 W, 3415 m.a.s.l. | Slope fen.                                                                 | Cephalozia sp              | 1/29/09 | 3977 |
| SUM5 | SUM5_12 | Sumapaz. Road to Nazareth. Fen close to trout fishery at roadside. 4.2759 N, -74.1969 W, 3415 m.a.s.l. | Slope fen.                                                                 | Moss                       | 1/29/09 | 3978 |
| SUM6 | SUM6_6  | Sumapaz. Road to Nazareth. Fen close to trout fishery at roadside. 4.2759 N, -74.1969 W, 3701 m.a.s.l. | Slope fen. Highly disturbed slope fen, in outflow from Lake "Laguna Negra" | Cephalozia sp              | 1/29/09 | 3979 |
| SUM6 | SUM6_7  | Sumapaz. Road to Nazareth. Fen close to trout fishery at roadside. 4.2759 N, -74.1969 W, 3701 m.a.s.l. | Slope fen. Highly disturbed slope fen, in outflow from Lake "Laguna Negra" | Moss                       | 1/29/09 | 3980 |
| SUM6 | SUM6_8  | Sumapaz. Road to Nazareth. Fen close to trout fishery at roadside. 4.2759 N, -74.1969 W, 3701 m.a.s.l. | Slope fen. Highly disturbed slope fen, in outflow from Lake "Laguna Negra" | Polytrichum commune        | 1/29/09 | 3981 |
| SUM6 | SUM6_11 | Sumapaz. Road to Nazareth. Fen close to trout fishery at roadside. 4.2759 N, -74.1969 W, 3701 m.a.s.l. | Slope fen. Highly disturbed slope fen, in outflow from Lake "Laguna Negra" | Polytrichum commune        | 1/29/09 | 3982 |
| SUM6 | SUM6_20 | Sumapaz. Road to Nazareth. Fen close to trout fishery at roadside. 4.2759 N, -74.1969 W, 3701 m.a.s.l. | Slope fen. Highly disturbed slope fen, in outflow from Lake "Laguna Negra" | Fossombronina sp           | 1/29/09 | 3986 |
| SUM6 | SUM6_21 | Sumapaz. Road to Nazareth. Fen close to trout fishery at roadside. 4.2759 N, -74.1969 W, 3701 m.a.s.l. | Slope fen. Highly disturbed slope fen, in outflow from Lake "Laguna Negra" | Ditrichum sp               | 1/29/09 | 3987 |



|      |         |                                                                                                        |                                                                                                         |                           |         |      |
|------|---------|--------------------------------------------------------------------------------------------------------|---------------------------------------------------------------------------------------------------------|---------------------------|---------|------|
| SUM6 | SUM6_23 | Sumapaz. Road to Nazareth. Fen close to trout fishery at roadside. 4.2759 N, -74.1969 W, 3701 m.a.s.l. | Slope fen. Highly disturbed slope fen, in outflow from Lake "Laguna Negra"                              | Sphagnum oxyphyllum       | 1/29/09 | 3988 |
| SUM6 | SUM6_25 | Sumapaz. Road to Nazareth. Fen close to trout fishery at roadside. 4.2759 N, -74.1969 W, 3701 m.a.s.l. | Slope fen. Highly disturbed slope fen, in outflow from Lake "Laguna Negra"                              | Sphagnum cyclophyllum     | 1/29/09 | 3989 |
| SUM6 | SUM6_26 | Sumapaz. Road to Nazareth. Fen close to trout fishery at roadside. 4.2759 N, -74.1969 W, 3701 m.a.s.l. | Slope fen. Highly disturbed slope fen, in outflow from Lake "Laguna Negra"                              | Stephaniella paraphyllina | 1/29/09 | 3990 |
| SUM6 | SUM6_28 | Sumapaz. Road to Nazareth. Fen close to trout fishery at roadside. 4.2759 N, -74.1969 W, 3701 m.a.s.l. | Slope fen. Highly disturbed slope fen, in outflow from Lake "Laguna Negra"                              | Bryum laevigatum          | 1/29/09 | 3991 |
| SUM7 | SUM7_3  | Sumapaz. Road to Nazareth. Fen close to trout fishery at roadside. 4.2759 N, -74.1969 W, 3645 m.a.s.l. | Lake fen. Small glacier cirques with small lake, peatland developed from terrestrialization of the lake | Brachytecium sp           | 1/30/09 | 3993 |
| SUM8 | SUM8_6  | Sumapaz. Road to Nazareth. Fen close to trout fishery at roadside. 4.2759 N, -74.1969 W, 3616 m.a.s.l. | Stream fen. Fen developed from small stream running from lake "Laguna Negra"                            | Sphagnum magellanicum     | 1/30/09 | 3995 |
| SUM8 | SUM8_11 | Sumapaz. Road to Nazareth. Fen close to trout fishery at roadside. 4.2759 N, -74.1969 W, 3616 m.a.s.l. | Stream fen. Fen developed from small stream running from lake "Laguna Negra"                            | Campylopus arctocarpus    | 1/30/09 | 3996 |
| SUM8 | SUM8_15 | Sumapaz. Road to Nazareth. Fen close to trout fishery at roadside. 4.2759 N, -74.1969 W, 3616 m.a.s.l. | Stream fen. Fen developed from small stream running from lake "Laguna Negra"                            | Dicranella sp             | 1/30/09 | 3999 |
| SUM8 | SUM8_16 | Sumapaz. Road to Nazareth. Fen close to trout fishery at roadside. 4.2759 N, -74.1969 W, 3616 m.a.s.l. | Stream fen. Fen developed from small stream running from lake "Laguna Negra"                            | Campylopus sp             | 1/30/09 | 4000 |

|      |           |                                                                                                        |                                                                                   |                        |         |      |
|------|-----------|--------------------------------------------------------------------------------------------------------|-----------------------------------------------------------------------------------|------------------------|---------|------|
| SUM9 | SUM9_11   | Sumapaz. Road to Nazareth. Fen close to trout fishery at roadside. 4.2759 N, -74.1969 W, 3621 m.a.s.l. | Raised bog. Bog dome developed from small stream running from lake "Laguna Negra" | Isotachis sp           | 1/30/09 | 4002 |
| SUM9 | SUM9_16   | Sumapaz. Road to Nazareth. Fen close to trout fishery at roadside. 4.2759 N, -74.1969 W, 3621 m.a.s.l. | Raised bog. Bog dome developed from small stream running from lake "Laguna Negra" | Lepidozia sp           | 1/30/09 | 4004 |
| SUM9 | SUM9_18   | Sumapaz. Road to Nazareth. Fen close to trout fishery at roadside. 4.2759 N, -74.1969 W, 3621 m.a.s.l. | Raised bog. Bog dome developed from small stream running from lake "Laguna Negra" | Campylopus arctocarpus | 1/30/09 | 4006 |
| SUM9 | SUM9_20   | Sumapaz. Road to Nazareth. Fen close to trout fishery at roadside. 4.2759 N, -74.1969 W, 3621 m.a.s.l. | Raised bog. Bog dome developed from small stream running from lake "Laguna Negra" | Riccardia paramorum    | 1/30/09 | 4008 |
| BE13 | BE13_XX   | Antioquia, Belmira, Paramo de Belmira, Sitio La Laguna. 6.6722 N, -75.6685 W, 3270 m.a.s.l.            | Stream fen. Large raised peatland in upland plateau                               |                        | 6/26/10 | 5469 |
| BE11 | BE11_8    | Antioquia, Belmira, Paramo de Belmira, Sitio La Laguna. 6.6668 N, -75.6691 W, 3269 m.a.s.l.            | Stream fen. Large raised peatland in upland plateau                               | Isoetes sp             | 2/24/10 | 5470 |
| BE11 | BE11_X1   | Antioquia, Belmira, Paramo de Belmira, Sitio La Laguna. 6.6668 N, -75.6691 W, 3269 m.a.s.l.            | Stream fen. Large raised peatland in upland plateau                               |                        | 2/24/10 | 5471 |
| BE11 | BE11_WP34 | Antioquia, Belmira, Paramo de Belmira, Sitio La Laguna. 6.6668 N, -75.6691 W, 3269 m.a.s.l.            | Stream fen. Large raised peatland in upland plateau                               |                        | 2/24/10 | 5472 |
| BE11 | BE11_X2   | Antioquia, Belmira, Paramo de Belmira, Sitio La Laguna. 6.6668 N, -75.6691 W, 3269 m.a.s.l.            | Stream fen. Large raised peatland in upland plateau                               |                        | 2/24/10 | 5473 |

|      |                  |                                                                                                                  |                                                                    |  |         |      |
|------|------------------|------------------------------------------------------------------------------------------------------------------|--------------------------------------------------------------------|--|---------|------|
| CHI1 | CHI1_<br>JCB4650 | Cundinamarca, Fomeque, PNN Chingaza, Heads of “Rio Frio”, Laguna de Chingaza. 4.501 N, −73.7531 W, 3333 m.a.s.l. | Stream fen. Peatland in backwater floodplain from Rio Frio margins |  | 3/12/10 | 4650 |
| CHI1 | CHI1_<br>JCB4651 | Cundinamarca, Fomeque, PNN Chingaza, Heads of “Rio Frio”, Laguna de Chingaza. 4.501 N, −73.7531 W, 3333 m.a.s.l. | Stream fen. Peatland in backwater floodplain from Rio Frio margins |  | 3/12/10 | 4651 |
| CHI1 | CHI1_<br>JCB4652 | Cundinamarca, Fomeque, PNN Chingaza, Heads of “Rio Frio”, Laguna de Chingaza. 4.501 N, −73.7531 W, 3333 m.a.s.l. | Stream fen. Peatland in backwater floodplain from Rio Frio margins |  | 3/12/10 | 4652 |
| CHI1 | CHI1_<br>JCB4653 | Cundinamarca, Fomeque, PNN Chingaza, Heads of “Rio Frio”, Laguna de Chingaza. 4.501 N, −73.7531 W, 3333 m.a.s.l. | Stream fen. Peatland in backwater floodplain from Rio Frio margins |  | 3/12/10 | 4653 |
| CHI1 | CHI1_<br>JCB4654 | Cundinamarca, Fomeque, PNN Chingaza, Heads of “Rio Frio”, Laguna de Chingaza. 4.501 N, −73.7531 W, 3333 m.a.s.l. | Stream fen. Peatland in backwater floodplain from Rio Frio margins |  | 3/12/10 | 4654 |
| CHI1 | CHI1_<br>JCB4655 | Cundinamarca, Fomeque, PNN Chingaza, Heads of “Rio Frio”, Laguna de Chingaza. 4.501 N, −73.7531 W, 3333 m.a.s.l. | Stream fen. Peatland in backwater floodplain from Rio Frio margins |  | 3/12/10 | 4655 |
| CHI1 | CHI1_<br>JCB4656 | Cundinamarca, Fomeque, PNN Chingaza, Heads of “Rio Frio”, Laguna de Chingaza. 4.501 N, −73.7531 W, 3333 m.a.s.l. | Stream fen. Peatland in backwater floodplain from Rio Frio margins |  | 3/12/10 | 4656 |

|       |                   |                                                                                                                           |                                                                                                             |  |         |      |
|-------|-------------------|---------------------------------------------------------------------------------------------------------------------------|-------------------------------------------------------------------------------------------------------------|--|---------|------|
| COC11 | COC11_<br>JCB4701 | Boyaca, Guican. Valle de los cojines.<br>6.4802 N, -72.2806 W, 4217 m.a.s.l.                                              | Stream fen. Large fen with cushion plants<br>in between the two streams on the south<br>side of the complex |  | 1/8/10  | 4701 |
| CHI1  | CHI1_X1           | Cundinamarca, Fomeque, PNN<br>Chingaza, Heads of "Rio Frio", Laguna<br>de Chingaza. 4.501 N, -73.7531 W, 3333<br>m.a.s.l. | Stream fen. Peatland in backwater<br>floodplain from Rio Frio margins                                       |  | 3/12/10 | 4702 |
| CHI1  | CHI1_X2           | Cundinamarca, Fomeque, PNN<br>Chingaza, Heads of "Rio Frio", Laguna<br>de Chingaza. 4.501 N, -73.7531 W, 3333<br>m.a.s.l. | Stream fen. Peatland in backwater<br>floodplain from Rio Frio margins                                       |  | 3/12/10 | 4703 |
| COC11 | COC11_X1          | Boyaca, Guican. Valle de los cojines.<br>6.4802 N, -72.2806 W, 4217 m.a.s.l.                                              | Stream fen. Large fen with cushion plants<br>in between the two streams on the south<br>side of the complex |  | 1/8/10  | 4704 |
| COC11 | COC11_X2          | Boyaca, Guican. Valle de los cojines.<br>6.4802 N, -72.2806 W, 4217 m.a.s.l.                                              | Stream fen. Large fen with cushion plants<br>in between the two streams on the south<br>side of the complex |  | 1/8/10  | 4705 |
| COC11 | COC11_X3          | Boyaca, Guican. Valle de los cojines.<br>6.4802 N, -72.2806 W, 4217 m.a.s.l.                                              | Stream fen. Large fen with cushion plants<br>in between the two streams on the south<br>side of the complex |  | 1/8/10  | 4706 |
| COC11 | COC11_X4          | Boyaca, Guican. Valle de los cojines.<br>6.4802 N, -72.2806 W, 4217 m.a.s.l.                                              | Stream fen. Large fen with cushion plants<br>in between the two streams on the south<br>side of the complex |  | 1/8/10  | 4707 |
| COC11 | COC11_X5          | Boyaca, Guican. Valle de los cojines.<br>6.4802 N, -72.2806 W, 4217 m.a.s.l.                                              | Stream fen. Large fen with cushion plants<br>in between the two streams on the south<br>side of the complex |  | 1/8/10  | 4708 |
| COC12 | COC12_X6          | Boyaca, Guican. Pantano de los Patos.<br>6.4948 N, -72.2882 W, 4493 m.a.s.l.                                              | Plateau fen. Cushion plants in plateau fen                                                                  |  | 1/9/10  | 4709 |

|       |           |                                                                              |                                                                                                             |  |        |      |
|-------|-----------|------------------------------------------------------------------------------|-------------------------------------------------------------------------------------------------------------|--|--------|------|
| COC12 | COC12_X7  | Boyaca, Guican. Pantano de los Patos.<br>6.4948 N, −72.2882 W, 4493 m.a.s.l. | Plateau fen. Cushion plants in plateau fen                                                                  |  | 1/9/10 | 4710 |
| COC12 | COC12_X8  | Boyaca, Guican. Pantano de los Patos.<br>6.4948 N, −72.2882 W, 4493 m.a.s.l. | Plateau fen. Cushion plants in plateau fen                                                                  |  | 1/9/10 | 4711 |
| COC12 | COC12_X9  | Boyaca, Guican. Pantano de los Patos.<br>6.4948 N, −72.2882 W, 4493 m.a.s.l. | Plateau fen. Cushion plants in plateau fen                                                                  |  | 1/9/10 | 4712 |
| COC12 | COC12_X10 | Boyaca, Guican. Pantano de los Patos.<br>6.4948 N, −72.2882 W, 4493 m.a.s.l. | Plateau fen. Cushion plants in plateau fen                                                                  |  | 1/9/10 | 4713 |
| COC1  | COC1_X11  | Boyaca, Guican. Valle de los cojines.<br>6.4786 N, −72.2784 W, 4198 m.a.s.l. | Stream fen. Large fen with cushion plants                                                                   |  | 1/6/10 | 4714 |
| COC12 | COC12_X12 | Boyaca, Guican. Pantano de los Patos.<br>6.4948 N, −72.2882 W, 4493 m.a.s.l. | Plateau fen. Cushion plants in plateau fen                                                                  |  | 1/9/10 | 4715 |
| COC12 | COC12_X13 | Boyaca, Guican. Pantano de los Patos.<br>6.4948 N, −72.2882 W, 4493 m.a.s.l. | Plateau fen. Cushion plants in plateau fen                                                                  |  | 1/9/10 | 4716 |
| COC11 | COC11_X14 | Boyaca, Guican. Valle de los cojines.<br>6.4802 N, −72.2806 W, 4217 m.a.s.l. | Stream fen. Large fen with cushion plants<br>in between the two streams on the south<br>side of the complex |  | 1/8/10 | 4717 |
| COC11 | COC11_X15 | Boyaca, Guican. Valle de los cojines.<br>6.4802 N, −72.2806 W, 4217 m.a.s.l. | Stream fen. Large fen with cushion plants<br>in between the two streams on the south<br>side of the complex |  | 1/8/10 | 4718 |
| COC11 | COC11_X16 | Boyaca, Guican. Valle de los cojines.<br>6.4802 N, −72.2806 W, 4217 m.a.s.l. | Stream fen. Large fen with cushion plants<br>in between the two streams on the south<br>side of the complex |  | 1/8/10 | 4719 |
| COC11 | COC11_X17 | Boyaca, Guican. Valle de los cojines.<br>6.4802 N, −72.2806 W, 4217 m.a.s.l. | Stream fen. Large fen with cushion plants<br>in between the two streams on the south<br>side of the complex |  | 1/8/10 | 4720 |

|       |           |                                                                              |                                                                                                             |  |        |      |
|-------|-----------|------------------------------------------------------------------------------|-------------------------------------------------------------------------------------------------------------|--|--------|------|
| COC11 | COC11_X18 | Boyaca, Guican. Valle de los cojines.<br>6.4802 N, -72.2806 W, 4217 m.a.s.l. | Stream fen. Large fen with cushion plants<br>in between the two streams on the south<br>side of the complex |  | 1/8/10 | 4721 |
| COC11 | COC11_X19 | Boyaca, Guican. Valle de los cojines.<br>6.4802 N, -72.2806 W, 4217 m.a.s.l. | Stream fen. Large fen with cushion plants<br>in between the two streams on the south<br>side of the complex |  | 1/8/10 | 4722 |

**Table S2.** Fitted environmental vectors for all species, bryophytes only, and vascular plant species only on NMDS ordinations (Figure 3). r-square is goodness of fit of vector to environmental variable values. *p*-value is calculated as the proportion of values with larger r-square after 1000 permutations.

| Species      |              |                 |
|--------------|--------------|-----------------|
| Variables    | r-square     | <i>p</i> -value |
| Conductivity | 0.191        | 0.001           |
| Elevation    | <b>0.631</b> | <b>0.001</b>    |
| pH           | 0.196        | 0.004           |

**Table S3.** PERMANOVA table for all vegetation types combined and for specific contrasts among all vegetation types differentiated for the vegetation of 121 Andean peatlands. Probabilities are corrected by the number of comparisons.

| Source          | Df  | SS    | MSS    | F.Model | R2      | Pr(>F) |
|-----------------|-----|-------|--------|---------|---------|--------|
| Vegetation type | 4   | 9.31  | 3.6454 | 11.207  | 0.26177 | 0.001  |
| Residuals       | 117 | 32.42 | 0.2659 |         |         |        |
| Total           | 120 | 41.73 | 1      |         |         |        |

---

**Contrasts**


---

| Combination of<br>vegetation groups | Sums Sqs | Mean Sqs | F Model | R2   | <i>p</i> value<br>corrected |
|-------------------------------------|----------|----------|---------|------|-----------------------------|
| Cushion–Grasses                     | 3.12     | 3.12     | 11.96   | 0.23 | 1.00E-04                    |
| Cushion–Sedges                      | 4.62     | 4.62     | 21.71   | 0.33 | 1.00E-04                    |
| Cushion–Sphagnum                    | 4.56     | 4.56     | 16.46   | 0.26 | 1.00E-04                    |
| Cushion–True mosses                 | 4.59     | 4.59     | 18.22   | 0.26 | 1.00E-04                    |
| Grasses–Sedges                      | 1.42     | 1.42     | 5.8     | 0.13 | 1.00E-04                    |
| Grasses–Sphagnum                    | 1.81     | 1.81     | 5.74    | 0.12 | 1.00E-04                    |
| Grasses–True mosses                 | 1.82     | 1.82     | 6.43    | 0.12 | 1.00E-04                    |
| Sedges–Sphagnum                     | 1.99     | 1.99     | 7.48    | 0.14 | 1.00E-04                    |
| Sedges–True mosses                  | 1.65     | 1.65     | 6.89    | 0.12 | 1.00E-04                    |
| Sphagnum–True<br>mosses             | 1.65     | 1.65     | 5.61    | 0.09 | 1.00E-04                    |

---

**Table S4.** Mean percent cover of the 260 species found in four different peat forming vegetation types from 121 peatlands in the northern Andes of Colombia.

| Species                          | Cushion | Sedges | Sphagnum | True   |         |
|----------------------------------|---------|--------|----------|--------|---------|
|                                  |         |        |          | mosses | Grasses |
| <i>Adelanthus decipiens</i>      | 0       | 0      | 0        | 3.5    | 0       |
| <i>Adelanthus pittieri</i>       | 3       | 0      | 0        | 0      | 3       |
| <i>Agerati tinifolia</i>         | 0       | 0      | 2*       | 1.5    | 0       |
| <i>Agrostis hanckea</i>          | 0       | 0      | 0        | 0      | 1       |
| <i>Agrostis trichodes</i>        | 0       | 0      | 0        | 6      | 0       |
| <i>Allobiella campanensis</i>    | 0       | 0      | 2.5      | 0      | 0       |
| <i>Astrophyllum nigrescens</i>   | 3.9*    | 0      | 4        | 2      | 1       |
| <i>Astrophyllum</i> sp           | 0       | 0      | 0        | 5      | 0       |
| <i>Andrewsianthus</i> sp         | 0       | 0      | 1        | 0      | 0       |
| <i>Aneura pinguis</i>            | 2.7     | 3.6    | 0        | 4      | 0       |
| <i>Anthoceros</i> sp             | 0       | 0      | 0        | 3      | 0       |
| <i>Anthoxanthum odoratum</i>     | 1       | 0      | 0        | 0      | 0       |
| <i>Aongstroemia filiformis</i>   | 0       | 3      | 1        | 0      | 0       |
| <i>Apiaceae</i> sp               | 0       | 0      | 0        | 5      | 3       |
| <i>Apiaceae</i> sp2              | 4       | 0      | 0        | 0      | 0       |
| <i>Apiaceae</i> sp3              | 1       | 0      | 0        | 0      | 0       |
| <i>Aptychella prolifera</i>      | 0       | 0      | 0        | 1      | 0       |
| <i>Arachniopsis coactilis</i>    | 3       | 1      | 1.3      | 0      | 0       |
| <i>Aragoa abieti</i>             | 0       | 1.7    | 0        | 1      | 0       |
| <i>Arcitophyllum albidum</i>     | 0       | 6.4    | 10       | 0      | 0       |
| <i>Arcytophyllum muticum</i>     | 0       | 4.3    | 6        | 4.4*   | 0       |
| <i>Atractylolopus longisetus</i> | 0       | 3      | 0        | 3      | 3       |
| <i>Azolla</i> sp                 | 0       | 0      | 0        | 6      | 0       |



| Species                   | Cushion | Sedges | Sphagnum | True   |         |
|---------------------------|---------|--------|----------|--------|---------|
|                           |         |        |          | mosses | Grasses |
| Bacharis revoluta         | 0       | 1.7    | 0        | 0      | 0       |
| Bacharis sp2              | 3       | 0      | 0        | 0      | 0       |
| Bacharis tricuneata       | 0       | 0      | 2.7      | 1.5    | 0       |
| Bartsia sp                | 2.8     | 1      | 1        | 1      | 1       |
| Bazzania sp               | 0       | 3      | 0        | 1      | 0       |
| Blechnum loxense          | 0       | 2      | 2.8*     | 1.3    | 0       |
| Brachytecium              |         |        |          |        |         |
| austroglareosum           | 4       | 0      | 1        | 1      | 3       |
| Breutelia chrysea         | 0       | 0      | 0        | 0*     | 0       |
| Breutelia chrysea         | 6.9     | 5.3    | 4.2      | 6.1    | 4.8     |
| Breutelia triae           | 0       | 1      | 0        | 0      | 0       |
| Bryohumbertia filifolia   | 0       | 0      | 0        | 3      | 0       |
| Bryum alpinum             | 3.5     | 0      | 0        | 0      | 0       |
| Bryum argenteum           | 2.8     | 0      | 0        | 1      | 0       |
| Bryum laevigatum          | 0       | 0      | 1        | 2      | 3       |
| Calamagrostis effussa     | 2.1     | 5.4    | 6.1      | 3.7    | 6.4*    |
| Calamagrostis fibrovagita | 6       | 3.8    | 1        | 3.8    | 5       |
| Calypogeia rhombifolia    | 0       | 0      | 2.5      | 4      | 0       |
| Campylium polygamum       | 6       | 0      | 0        | 0      | 0       |
| Campylophyllum halleri    | 2       | 0      | 0        | 0      | 3       |
| Campylopus aerodyction    | 0       | 0      | 0        | 6      | 0       |
| Campylopus cuspidatus     | 3.4     | 4.4*   | 4        | 4      | 2.9     |
| Campylopus edithae        | 0       | 0      | 0        | 1      | 0       |
| Campylopus nivalis        | 6.6     | 3.4    | 2.8      | 3.5    | 4.5     |
| Campylopus pauper         | 0       | 1      | 8        | 3.2    | 0       |
| Campylopus richardii      | 2.6     | 2      | 1        | 0      | 0       |

| Species                     | Cushion | Sedges | Sphagnum | True   |         |
|-----------------------------|---------|--------|----------|--------|---------|
|                             |         |        |          | mosses | Grasses |
| Campylopus sharpii          | 0       | 0      | 0        | 1      | 0       |
| Campylopus sp               | 0       | 3      | 3        | 0      | 0       |
| Campylopus tallulensis      | 0       | 0      | 3        | 9      | 0       |
| Campylopus trichophylloides | 0       | 0      | 0        | 2.5    | 0       |
| Campylopus trivialis        | 4.8     | 0      | 2        | 4      | 0       |
| Cardamine boriensis         | 0       | 2      | 0        | 2.8    | 0       |
| Carex bonplandii            | 11      | 9.5    | 5        | 6.8    | 13.4    |
| Carex pichinchensis         | 0       | 1      | 3        | 2      | 0       |
| Carex pygmaea               | 4.3     | 5.4    | 2.8      | 1.7    | 11.5*   |
| Carex sp                    | 0       | 0      | 7        | 0      | 0       |
| Carex sp2                   | 7.3     | 0      | 0        | 0      | 0       |
| Cariophyllum sp             | 8       | 0      | 0        | 0      | 0       |
| Carophyllaceae indet        | 0       | 1      | 0        | 0      | 0       |
| Castratella pilloseroides   | 0       | 0      | 2        | 0      | 0       |
| Cavendishia bracteata       | 0       | 0      | 2        | 0      | 0       |
| Cephalozia sp               | 0       | 0      | 2.3      | 1.7    | 1.3     |
| Cephalozia sp2              | 1       | 0      | 0        | 0      | 0       |
| Cerastium arvense           | 0       | 1      | 0        | 1.5    | 0       |
| Cerastium cf subspicatum    | 0       | 0      | 0        | 4      | 0       |
| Cerastium sp                | 3.3     | 0      | 0        | 3      | 0       |
| Cerastium sp2               | 1.3     | 0      | 0        | 0      | 0       |
| Chusquea tessellata         | 0       | 4      | 3.3      | 6.6    | 0       |
| Clasmatocolea sp            | 1       | 0      | 0        | 0      | 0       |
| Cocclidium sp               | 0       | 0      | 0        | 2      | 0       |
| Commeli sp                  | 0       | 0      | 2        | 0      | 0       |
| Cortaderia nitida           | 1       | 4.1    | 5.3      | 6.6    | 2.2     |

| Species                           | Cushion | Sedges | Sphagnum | True   |         |
|-----------------------------------|---------|--------|----------|--------|---------|
|                                   |         |        |          | mosses | Grasses |
| <i>Crassula venezulensis</i>      | 3       | 1      | 0        | 2      | 0       |
| <i>Daltonia tenuifolia</i>        | 1       | 0      | 0        | 0      | 0       |
| <i>Dicranum frigidum</i>          | 0       | 1      | 0        | 1      | 0       |
| <i>Dicranum peruvianum</i>        | 1       | 0      | 0        | 0      | 0       |
| <i>Didymodon rigidulus</i>        | 0       | 0      | 0        | 1      | 0       |
| <i>Diplostephium phyllicoides</i> | 2       | 0      | 0        | 0      | 0       |
| <i>Diplostephium revolutum</i>    | 0       | 1.9    | 0        | 3.4    | 0       |
| <i>Diplostephium romeroi</i>      | 0       | 0      | 3        | 0      | 3       |
| <i>Diplostephium</i> sp           | 2       | 0      | 3        | 0      | 1       |
| <i>Diplostephium</i> sp1          | 0       | 2      | 0        | 1      | 0       |
| <i>Diplostephium</i> sp2          | 0       | 0      | 2.8      | 0      | 0       |
| <i>Disterigma alaternoides</i>    | 0       | 1      | 0        | 3*     | 1       |
| <i>Distichia muscoides</i>        | 18.8*   | 0      | 0        | 0      | 6       |
| <i>Ditrichum rufescens</i>        | 0       | 0      | 0        | 1      | 3       |
| <i>Drepanocladus aduncus</i>      | 2.5     | 2      | 1        | 2      | 5       |
| <i>Drepanocladus longifolius</i>  | 0       | 0      | 0        | 1      | 0       |
| <i>Entodon</i> sp                 | 1       | 0      | 0        | 0      | 0       |
| <i>Equisetum bogotensis</i>       | 0       | 0      | 0        | 1      | 1       |
| <i>Eriosorus</i> sp               | 0       | 0      | 1.5      | 1      | 0       |
| <i>Erythrophyllastrum andinum</i> | 0       | 0      | 0        | 2      | 0       |
| <i>Escallonia myrtilloides</i>    | 0       | 0      | 0        | 2.7    | 0       |
| <i>Espeletia argentea</i>         | 0       | 1      | 0        | 0      | 0       |
| <i>Espeletia grandiflora</i>      | 0       | 4.1*   | 3        | 1      | 2.5     |
| <i>Espeletia lopezii</i>          | 1.3     | 0      | 0        | 0      | 0       |
| <i>Espeletia occidentalis</i>     | 0       | 0      | 0        | 0      | 3.7*    |
| <i>Floscaldasias</i> sp           | 2.5     | 0      | 0        | 0      | 0       |

| Species                      | Cushion | Sedges | Sphagnum | True   |         |
|------------------------------|---------|--------|----------|--------|---------|
|                              |         |        |          | mosses | Grasses |
| Fossombronia peruvia         | 3.3     | 0      | 0        | 1      | 0       |
| Fossombronia sp              | 0       | 0      | 0        | 4      | 0       |
| Frullania sp                 | 0       | 0      | 1        | 2      | 0       |
| Galium ascendens             | 0       | 0      | 0        | 3.4    | 0       |
| Galium sp                    | 0       | 0      | 0        | 1      | 0       |
| Gaultheria sp                | 0       | 0      | 3        | 0      | 0       |
| Gentia sedifolia             | 2       | 1      | 2        | 0      | 1.4     |
| Gentianella sp               | 2       | 0      | 2        | 0      | 0       |
| Geranium multiceps           | 2       | 0      | 0        | 1      | 0       |
| Geranium sibbaldioides       | 2.8     | 1      | 0        | 0      | 0       |
| Gphalium paramonum           | 8       | 0      | 0        | 0      | 0       |
| Gongylanthus gratensis       | 0       | 1      | 0        | 1      | 0       |
| Gymnostomum aeruginosum      | 0       | 0      | 0        | 1      | 0       |
| Gynoxis sp                   | 0       | 1.3    | 0        | 0      | 0       |
| Halenia gunerifolia          | 0       | 2.3    | 6        | 1      | 1       |
| Herbertus divergens          | 0       | 0      | 3        | 1      | 0       |
| Hesperomeles heterophylla    | 0       | 0      | 1        | 0      | 0       |
| Hesperomeles sp              | 0       | 1      | 0        | 0      | 0       |
| Huperzia crassa              | 1.2     | 3.3    | 0        | 2      | 1       |
| Hydrocotile gunnerifolia     | 6       | 0      | 0        | 0      | 0       |
| Hydrocotile sp               | 0       | 0      | 1.2      | 2.6    | 0       |
| Hymenostylium recurvirostrum | 3       | 0      | 0        | 0      | 0       |
| Hypericum juniperinum        | 1.6     | 1.2    | 1        | 2      | 1.7     |
| Hypericum mirtyfolium        | 0       | 1      | 0        | 0      | 0       |
| Hypericum muticum            | 0       | 3      | 0        | 3.5    | 0       |

| Species                          | Cushion | Sedges | Sphagnum | True   |         |
|----------------------------------|---------|--------|----------|--------|---------|
|                                  |         |        |          | mosses | Grasses |
| <i>Hypericum myricaefolium</i>   | 0       | 1      | 1        | 2.7    | 0       |
| <i>Hypericum niviefolium</i>     | 0       | 0      | 0        | 0      | 2       |
| <i>Hypericum strictum</i>        | 0       | 0      | 0        | 2.5    | 0       |
| <i>Hypericum vaccinioides</i>    | 0       | 0      | 0        | 0      | 1       |
| <i>Hypnum cupressiforme</i>      | 1       | 2      | 1.7      | 3.3*   | 0       |
| <i>Hypochaeris sessiliflora</i>  | 4.3     | 0      | 0        | 0      | 4.6     |
| <i>Hypochaeris</i> sp            | 1.2     | 0      | 2        | 0      | 1       |
| <i>Hypochaeris</i> sp2           | 0       | 0      | 3        | 1      | 1       |
| <i>Hypochaeris</i> sp3           | 0       | 0      | 0        | 0      | 1       |
| <i>Hypochaeris</i> sp4           | 3.5     | 0      | 0        | 0      | 3.3     |
| <i>Hypochaeris</i> sp5           | 0       | 0      | 0        | 0      | 4       |
| <i>Hypochaeris taraxacifolia</i> | 0       | 0      | 1.5      | 0      | 0       |
| <i>Isoetes</i> sp                | 0       | 3      | 2        | 0      | 0       |
| <i>Isotachis multiceps</i>       | 7.4     | 1.7    | 2        | 2.3    | 1       |
| <i>Jamesonia</i> sp              | 0       | 0      | 0        | 1      | 1       |
| <i>Jamesoniella rubricaulis</i>  | 0       | 4.2    | 3        | 2.7    | 5.3     |
| <i>Juncus breviculmis</i>        | 0       | 3.3    | 5.5      | 1      | 0       |
| <i>Juncus effusus</i>            | 0       | 0      | 1.9*     | 1      | 0       |
| <i>Jungermannia</i> sp           | 3.8     | 0      | 0        | 0      | 0       |
| <i>Kurzia capillaris</i>         | 0       | 1      | 2.5      | 2      | 1       |
| <i>Lachemilla mandonia</i>       | 0       | 4      | 2        | 2.7    | 0       |
| <i>Lachemilla nivalis</i>        | 1.8     | 0      | 1.8      | 4      | 3       |
| <i>lachemilla orbicularis</i>    | 2       | 3.6    | 1        | 5      | 3       |
| <i>Lachemilla</i> sp             | 3.7     | 0      | 1.5      | 1      | 0       |
| <i>Lachemilla</i> sp2            | 4       | 0      | 0        | 0      | 0       |
| <i>Lachemilla</i> sp3            | 0       | 0      | 0        | 0      | 1       |

| Species                  | Cushion | Sedges | Sphagnum | True   |         |
|--------------------------|---------|--------|----------|--------|---------|
|                          |         |        |          | mosses | Grasses |
| Lepidozia macrocolea     | 0       | 2.8    | 0        | 3.2    | 2       |
| Leptodontium flexifolium | 1       | 0      | 0        | 1      | 0       |
| Leptodontium luteum      | 0       | 0      | 0        | 2.5    | 0       |
| Leptoscyphus porphyrius  | 0       | 1      | 0        | 1      | 0       |
| Lobatiriccardia sp       | 1       | 0      | 0        | 0      | 1       |
| Lophocolea sp            | 0       | 1      | 1        | 1      | 0       |
| Lophocolea sp2           | 0       | 0      | 0        | 1      | 0       |
| Lophozia cf anomala      | 0       | 0      | 0        | 1      | 0       |
| Lophozia sp              | 3.5     | 1      | 4        | 0      | 1       |
| Lophozia sp2             | 3*      | 0      | 0        | 0      | 1       |
| Lophozia sp3             | 0       | 1      | 3.5      | 0      | 0       |
| Loricaria complata       | 1       | 0      | 0        | 0      | 1       |
| Lycopodiella glaucescens | 0       | 0      | 2.1      | 3.7    | 1       |
| Lysipomia sphagnophila   | 3       | 4.3    | 0        | 4.5    | 0       |
| Marchantia berteroa      | 7       | 0      | 0        | 4      | 0       |
| Marchantia breviloba     | 0       | 0      | 0        | 4      | 0       |
| Marchantia polymorpha    | 0       | 0      | 0        | 3      | 0       |
| Marsupella sp            | 1       | 0      | 0        | 0      | 5       |
| Metzgeria sinuata        | 0       | 1      | 0        | 0      | 0       |
| Miconia sp               | 0       | 1      | 0        | 0      | 0       |
| Moni sp                  | 0       | 1.5    | 0        | 0      | 0       |
| Montia fonta             | 0       | 0      | 0        | 1      | 0       |
| Muhlenbergia fastigiata  | 0       | 14     | 0        | 1.5    | 0       |
| Myriophyllum aquaticum   | 3       | 0      | 0        | 2.3    | 0       |
| rdia succulenta          | 2       | 0      | 0        | 3.5    | 0       |
| Nertera gradensis        | 1       | 2.3    | 3.5*     | 2.8    | 3       |

| Species                     | Cushion | Sedges | Sphagnum | True   |         |
|-----------------------------|---------|--------|----------|--------|---------|
|                             |         |        |          | mosses | Grasses |
| Niphogeton terta            | 0       | 0      | 0        | 3      | 0       |
| Noteroclada confluens       | 0       | 1      | 0        | 2.4    | 0       |
| Odontoschisma sp            | 0       | 0      | 0        | 4      | 0       |
| Omphalanthus filiformis     | 0       | 0      | 0        | 1      | 0       |
| Oreobolus cleefi            | 0       | 0      | 0        | 2.6    | 3       |
| Oreobolus sp                | 0       | 0      | 0        | 0      | 6.7*    |
| Orthrosanthus               |         |        |          |        |         |
| chimboracensis              | 0       | 0      | 0        | 1      | 0       |
| Paepalanthus colombianus    | 0       | 2.3    | 2.7*     | 2.3    | 2.8     |
| Paepalanthus lodicoloides   | 0       | 0      | 5.3      | 2.5    | 0       |
| Paspalum hirtum             | 0       | 0      | 1.8      | 0      | 0       |
| Pentacalia vaccinioides     | 4       | 0      | 2.5      | 3      | 1       |
| Peperomia sp                | 0       | 0      | 0        | 1      | 0       |
| Pernettya prostrata         | 3       | 5.7*   | 3.6      | 2      | 6.4     |
| Philonotis longiseta        | 0       | 1      | 1        | 0      | 5       |
| Pilopogon longirostris      | 11      | 0      | 2        | 0      | 0       |
| Plachiochila sp             | 0       | 0      | 1        | 3.5    | 0       |
| Plantago australis          | 0       | 1      | 0        | 0      | 0       |
| Plantago rigida             | 0       | 0      | 0        | 0      | 6.2     |
| Pleurozium schreberi        | 3.6     | 8.7    | 1        | 6.2    | 8.5     |
| Pohlia elongata             | 0       | 4      | 0        | 0      | 0       |
| Pohlia papillosa            | 1       | 0      | 0        | 1      | 0       |
| Polypodium sp               | 0       | 0      | 2        | 1      | 0       |
| Polytrichum commune         | 2       | 4.7    | 2.3      | 3.8    | 0       |
| Pseudocephalozia quadriloba | 2.8     | 0      | 3        | 0      | 0       |
| Pteridophyta indet          | 0       | 0      | 4        | 0      | 0       |

| Species                         | Cushion | Sedges | Sphagnum | True   |         |
|---------------------------------|---------|--------|----------|--------|---------|
|                                 |         |        |          | mosses | Grasses |
| Pteris sp                       | 0       | 0      | 1        | 0      | 0       |
| Puya goudutia                   | 0       | 2.5*   | 1.6      | 1.7    | 0       |
| puya killipi                    | 0       | 3      | 3        | 3      | 0       |
| Puya roldanii                   | 0       | 0      | 1.7      | 0      | 0       |
| Puya santonii                   | 0       | 1.8    | 2        | 2.4    | 0       |
| Radula sp                       | 1       | 0      | 0        | 0      | 3       |
| Ranunculus flageliformis        | 8       | 3      | 0        | 4.5    | 3       |
| Ranunculus sp                   | 0       | 0      | 0        | 1      | 0       |
| Rhacocarpus purpurascens        | 4.5     | 4.5    | 0        | 4      | 8.1*    |
| Rhodobryum longifolium          | 0       | 1      | 0        | 3      | 0       |
| Rhynchospora oreoboloidea       | 1.9     | 3.3    | 0        | 4.4    | 6.6*    |
| Ribes sp                        | 1.5     | 0      | 0        | 3      | 6       |
| Riccardia capillacea            | 0       | 0      | 0        | 3      | 0       |
| Riccardia columbica             | 4       | 1      | 0        | 3      | 4.5     |
| Riccardia papillata             | 8       | 0      | 0        | 0      | 0       |
| Riccardia paramorum             | 5.7     | 5.9*   | 3.6      | 3.4    | 3.9     |
| Riccardia regi                  | 3.3     | 0      | 0        | 1      | 3       |
| Riccia sp                       | 0       | 0      | 1        | 0      | 0       |
| Rubus sp                        | 0       | 0      | 1        | 0      | 0       |
| Rumex tolimensis                | 2       | 0      | 0        | 0      | 0       |
| Selaginella sp                  | 0       | 0      | 2        | 2      | 0       |
| Sematophyllum swartzii          | 0       | 0      | 0        | 0      | 3       |
| Senecio formosoides             | 1.2     | 0      | 0        | 0      | 0       |
| Sisyrinchium sp                 | 0       | 0      | 2        | 0      | 0       |
| Solenostoma<br>sphaerocarpoidea | 0       | 0      | 0        | 1      | 0       |



| Species                    | Cushion | Sedges | Sphagnum | True<br>mosses | Grasses |
|----------------------------|---------|--------|----------|----------------|---------|
| Sphaerothercium            |         |        |          |                |         |
| phascoideum                | 0       | 0      | 4        | 0              | 0       |
| Sphagnum angustifolium     | 0       | 0      | 11       | 9              | 6.5     |
| Sphagnum boyacanum         | 0       | 0      | 0        | 2              | 0       |
| Sphagnum caldense          | 0       | 0      | 0        | 6              | 0       |
| Sphagnum capillifolium     | 0       | 0      | 9        | 3.5            | 0       |
| Sphagnum cf antioquensis   | 0       | 0      | 2        | 0              | 0       |
| Sphagnum cf falcatulum     |         |        |          |                |         |
| Besch.                     | 0       | 10.3   | 15.5     | 13.5           | 25      |
| Sphagnum cleefii           | 0       | 0      | 0        | 1              | 0       |
| Sphagnum compactum         | 0       | 1      | 0        | 2.3            | 0       |
| Sphagnum cundimarcum       | 0       | 0      | 0        | 2.7            | 0       |
| Sphagnum cyclophyllum      | 3       | 0      | 0        | 0              | 0       |
| Sphagnum lescurii          | 0       | 4.6    | 2        | 1              | 0       |
| Sphagnum magellanicum      | 0       | 9.4*   | 8.4      | 4.6            | 5.5     |
| Sphagnum oxyphyllum        | 0       | 16.2   | 12       | 1              | 3.3     |
| Sphagnum pylaesii          | 2       | 11     | 8        | 0              | 0       |
| Sphagnum sancto-josephense | 8       | 8.4    | 12.7     | 10.6*          | 9.8     |
| Sphagnum sp nov            | 5.5     | 0      | 0        | 0              | 0       |
| Sphagnum tenerum           | 0       | 3.7    | 0        | 0              | 10.3    |
| Stachys cf eriantha        | 0       | 0      | 0        | 1              | 0       |
| Stephaniella paraphylli    | 0       | 0      | 0        | 1              | 0       |
| Straminergon stramineum    | 3       | 0      | 2.5      | 1.3            | 1       |
| Symphyogy bogotensis       | 0       | 0      | 0        | 1              | 0       |
| Symphyogy brasiliensis     | 1.7     | 0      | 3        | 0              | 1       |
| Symphyogy brongniartii     | 0       | 0      | 2        | 0              | 0       |

| Species                       | Cushion | Sedges | Sphagnum | True   |         |
|-------------------------------|---------|--------|----------|--------|---------|
|                               |         |        |          | mosses | Grasses |
| Symphyogy podophylla          | 0       | 0      | 13       | 1      | 0       |
| Sysirinchium sp               | 0       | 0      | 0        | 3      | 0       |
| Taraxacum officilis           | 0       | 0      | 1.5      | 0      | 0       |
| Thuidium peruvianum           | 1       | 0      | 0        | 1.8    | 0       |
| Trachyxiphium steerei         | 0       | 0      | 0        | 0      | 13      |
| Trichostomum<br>brachydontium | 1.8     | 0      | 0        | 0      | 0       |
| Utricularia sp                | 0       | 0      | 3        | 0      | 0       |
| Valeria plantagiceae          | 2.3     | 1.9    | 0        | 1.3    | 3       |
| Viola sp                      | 3       | 0      | 0        | 0      | 0       |
| Warnstorfia exannulata        | 4.6*    | 0      | 0        | 1      | 3       |
| Werneria pygmaea              | 6.4*    | 0      | 0        | 1      | 3       |
| Werneria sp2                  | 0       | 0      | 0        | 0      | 7       |
| Xenophyllum humile            | 5       | 0      | 0        | 0      | 0       |
| Xyris subulata                | 0       | 4.5    | 1.9      | 1      | 0       |

**Table S5.** Mean and SD values for water chemistry, climate, disturbance, peat chemistry, and carbon for three different peatland vegetation types in the northern Andes. Homogenous groups after Tukey's HSD are denoted by superscript letters ( $p < 0.05$ ), variables with non-significant differences in their means are n.s.

| Vegetation type | Cushion | Sedges | Grasses | True<br>mosses | Sphagnum |
|-----------------|---------|--------|---------|----------------|----------|
|-----------------|---------|--------|---------|----------------|----------|

**Site conditions**

|           |             |             |           |             |             |
|-----------|-------------|-------------|-----------|-------------|-------------|
| Elevation | 4384 ± 28.2 | 3569 ± 35.8 | 3693 ± 67 | 3359 ± 42.3 | 3170 ± 64.4 |
|-----------|-------------|-------------|-----------|-------------|-------------|

**Water chemistry**

|                                      |             |              |              |              |              |
|--------------------------------------|-------------|--------------|--------------|--------------|--------------|
| K <sup>+</sup> (mg l <sup>-1</sup> ) | 1.7 ± 0.364 | 0.45 ± 0.114 | 0.46 ± 0.097 | 0.91 ± 0.109 | 0.68 ± 0.153 |
|--------------------------------------|-------------|--------------|--------------|--------------|--------------|

|                                       |              |              |              |              |              |
|---------------------------------------|--------------|--------------|--------------|--------------|--------------|
| Na <sup>+</sup> (mg l <sup>-1</sup> ) | 3.78 ± 0.969 | 1.16 ± 0.052 | 2.27 ± 0.448 | 1.09 ± 0.109 | 1.11 ± 0.094 |
|---------------------------------------|--------------|--------------|--------------|--------------|--------------|

|                                        |               |              |              |           |              |
|----------------------------------------|---------------|--------------|--------------|-----------|--------------|
| Ca <sup>++</sup> (mg l <sup>-1</sup> ) | 12.39 ± 2.356 | 7.11 ± 0.877 | 5.82 ± 0.465 | 8 ± 0.546 | 7.91 ± 0.774 |
|----------------------------------------|---------------|--------------|--------------|-----------|--------------|

|                                        |              |              |             |              |             |
|----------------------------------------|--------------|--------------|-------------|--------------|-------------|
| Mg <sup>++</sup> (mg l <sup>-1</sup> ) | 1.98 ± 0.511 | 0.15 ± 0.015 | 0.5 ± 0.216 | 0.38 ± 0.077 | 0.18 ± 0.02 |
|----------------------------------------|--------------|--------------|-------------|--------------|-------------|

|    |              |              |              |              |            |
|----|--------------|--------------|--------------|--------------|------------|
| pH | 5.55 ± 0.158 | 4.84 ± 0.098 | 4.53 ± 0.185 | 5.04 ± 0.079 | 4.84 ± 0.1 |
|----|--------------|--------------|--------------|--------------|------------|

|                                                      |              |          |            |          |            |
|------------------------------------------------------|--------------|----------|------------|----------|------------|
| Water electrical conductivity (µS cm <sup>-1</sup> ) | 145.6 ± 41.1 | 17 ± 1.8 | 33.7 ± 9.8 | 26.7 ± 4 | 20.7 ± 2.4 |
|------------------------------------------------------|--------------|----------|------------|----------|------------|

**Peat chemistry**

|                                                 |              |              |              |              |              |
|-------------------------------------------------|--------------|--------------|--------------|--------------|--------------|
| Bulk density 0–10 cm deep (g cm <sup>-3</sup> ) | 0.06 ± 0.004 | 0.03 ± 0.004 | 0.06 ± 0.004 | 0.05 ± 0.005 | 0.05 ± 0.006 |
|-------------------------------------------------|--------------|--------------|--------------|--------------|--------------|

|                                                  |              |              |             |              |              |
|--------------------------------------------------|--------------|--------------|-------------|--------------|--------------|
| Bulk density 10–20 cm deep (g cm <sup>-3</sup> ) | 0.06 ± 0.005 | 0.05 ± 0.005 | 0.08 ± 0.01 | 0.06 ± 0.007 | 0.07 ± 0.007 |
|--------------------------------------------------|--------------|--------------|-------------|--------------|--------------|

|                                             |            |            |            |           |            |
|---------------------------------------------|------------|------------|------------|-----------|------------|
| Carbon content 0–10 cm (g m <sup>-2</sup> ) | 2382 ± 186 | 1397 ± 159 | 2041 ± 172 | 1707 ± 82 | 1445 ± 144 |
|---------------------------------------------|------------|------------|------------|-----------|------------|

|                                              |            |            |            |            |            |
|----------------------------------------------|------------|------------|------------|------------|------------|
| Carbon content 10–20 cm (g m <sup>-2</sup> ) | 2062 ± 130 | 1804 ± 179 | 2464 ± 244 | 1916 ± 195 | 2197 ± 229 |
|----------------------------------------------|------------|------------|------------|------------|------------|

|                                  |             |              |              |              |              |
|----------------------------------|-------------|--------------|--------------|--------------|--------------|
| Water storage 0–10 cm (% weight) | 0.9 ± 0.009 | 0.93 ± 0.009 | 0.93 ± 0.006 | 0.92 ± 0.005 | 0.91 ± 0.009 |
|----------------------------------|-------------|--------------|--------------|--------------|--------------|

|                                   |              |              |              |              |             |
|-----------------------------------|--------------|--------------|--------------|--------------|-------------|
| Water storage 10–20 cm (% weight) | 0.92 ± 0.007 | 0.94 ± 0.006 | 0.92 ± 0.011 | 0.91 ± 0.009 | 0.9 ± 0.012 |
|-----------------------------------|--------------|--------------|--------------|--------------|-------------|

|                        |              |              |              |             |              |
|------------------------|--------------|--------------|--------------|-------------|--------------|
| Water table depth (cm) | 14.62 ± 2.95 | 33.86 ± 2.97 | 15.59 ± 3.15 | 9.96 ± 2.08 | 16.26 ± 4.48 |
|------------------------|--------------|--------------|--------------|-------------|--------------|

|                                  |             |              |              |              |              |
|----------------------------------|-------------|--------------|--------------|--------------|--------------|
| Mg content (g kg <sup>-1</sup> ) | 1.1 ± 0.293 | 0.42 ± 0.043 | 0.52 ± 0.085 | 0.49 ± 0.055 | 0.53 ± 0.073 |
|----------------------------------|-------------|--------------|--------------|--------------|--------------|

|                                 |              |              |              |              |              |
|---------------------------------|--------------|--------------|--------------|--------------|--------------|
| K content (g kg <sup>-1</sup> ) | 2.91 ± 0.453 | 1.15 ± 0.219 | 0.84 ± 0.165 | 0.93 ± 0.134 | 2.24 ± 0.556 |
|---------------------------------|--------------|--------------|--------------|--------------|--------------|

|                                  |              |              |              |              |              |
|----------------------------------|--------------|--------------|--------------|--------------|--------------|
| Ca content (g kg <sup>-1</sup> ) | 15.93 ± 1.37 | 19.01 ± 2.57 | 18.46 ± 2.45 | 13.37 ± 1.49 | 13.31 ± 1.92 |
|----------------------------------|--------------|--------------|--------------|--------------|--------------|

---

|                                  |              |              |             |             |              |
|----------------------------------|--------------|--------------|-------------|-------------|--------------|
| Na content (g kg <sup>-1</sup> ) | 0.62 ± 0.104 | 0.54 ± 0.069 | 0.4 ± 0.046 | 0.3 ± 0.035 | 0.37 ± 0.046 |
|----------------------------------|--------------|--------------|-------------|-------------|--------------|

---
